# Supplementary material
Source: PubMed Central journal article supplement (PMC3437001)
Supplement: NIHMS392732-supplement-Supp_Fig_S1_Supp_Table_S1-S4.pdf [file NIHMS392732-supplement-Supp_Fig_S1_Supp_Table_S1-S4.pdf]

# Figure S1

## Kinesin-1 Disorder Predictions

Disorder Prediction

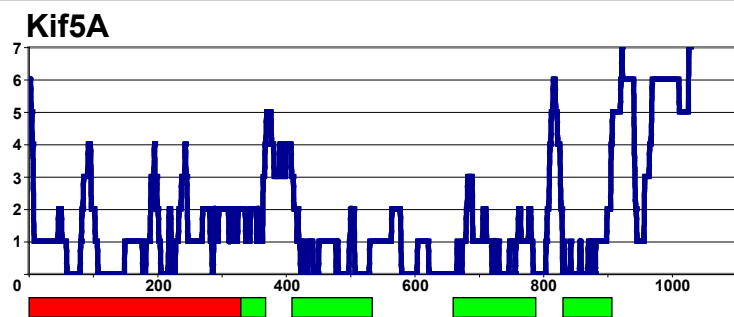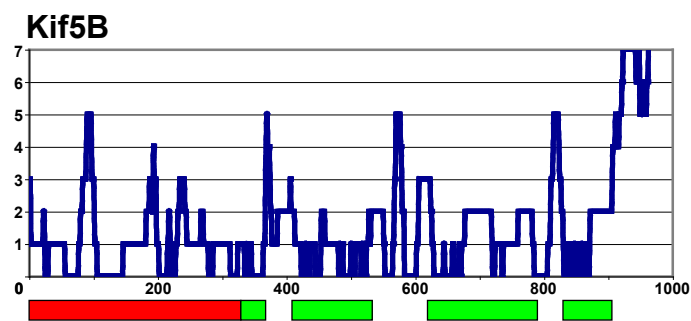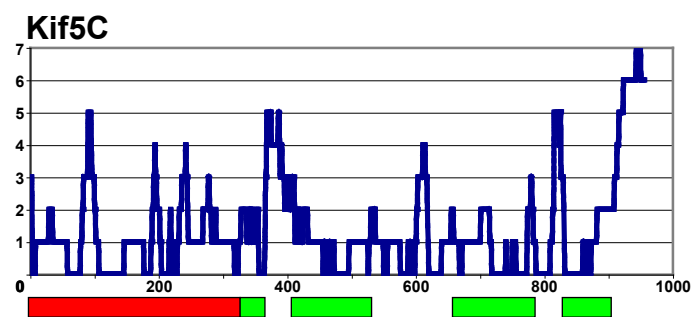

Residue

■ = Motor ■ = Coiled Coil

# Kinesin-2 Disorder Predictions

Disorder Prediction

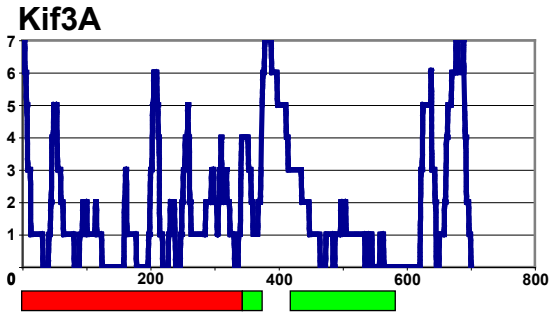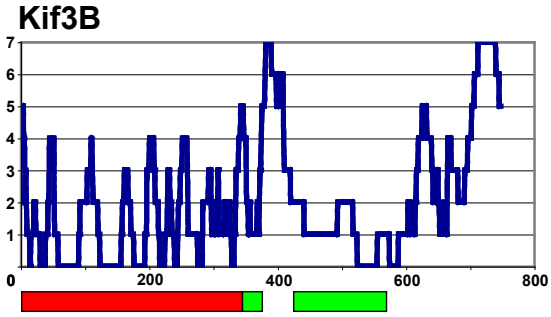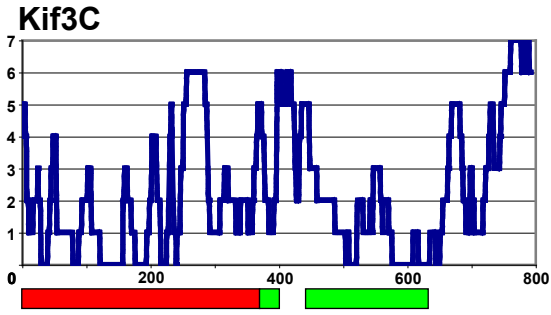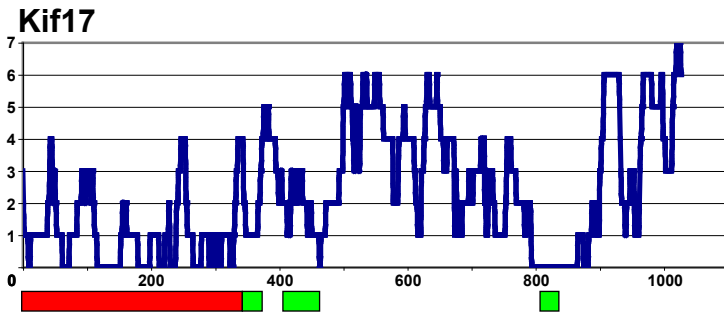

Residue

■ = Motor    ■ = Coiled Coil

# Kinesin-3 Disorder Predictions

Disorder Prediction

Kif1A

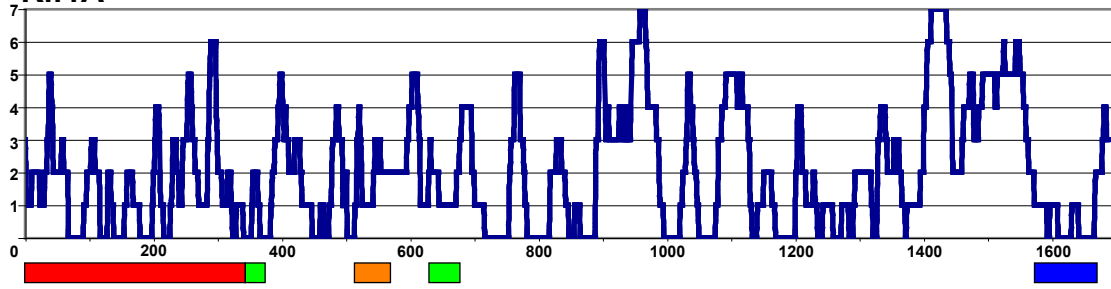

Kif1B $\alpha$

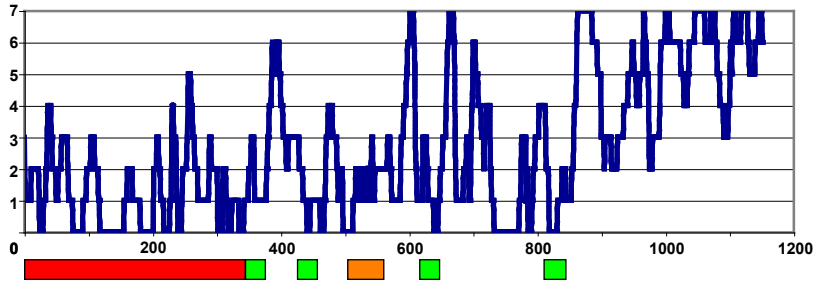

Kif1B $\beta$

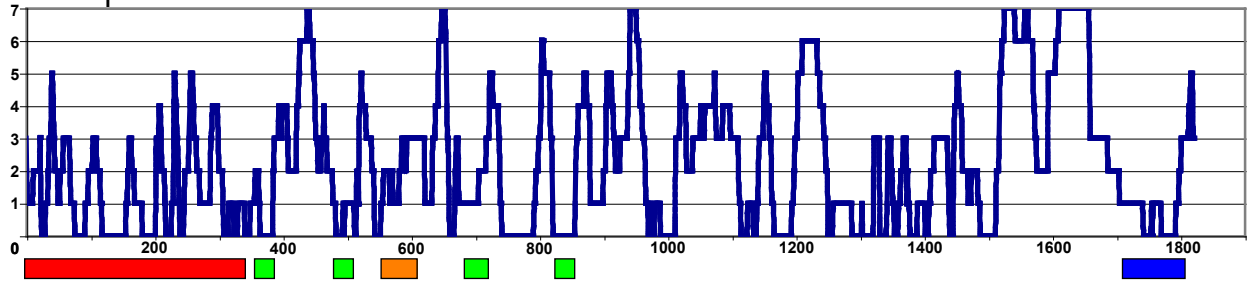

Kif1C

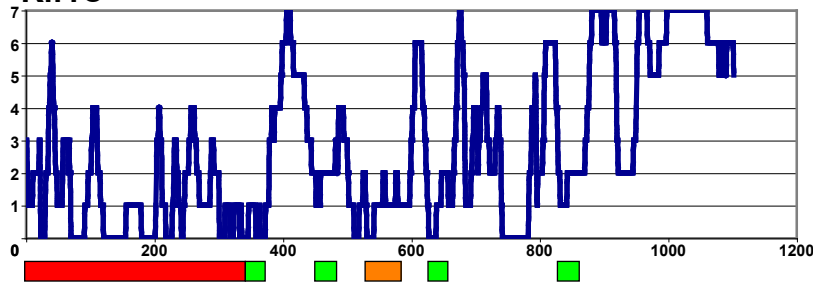

Residue

- = Motor
- = Coiled Coil
- = FHA
- = PH
- = PX
- = CAP-Gly

# Kinesin-3 Disorder Predictions

Disorder Prediction

Kif13A

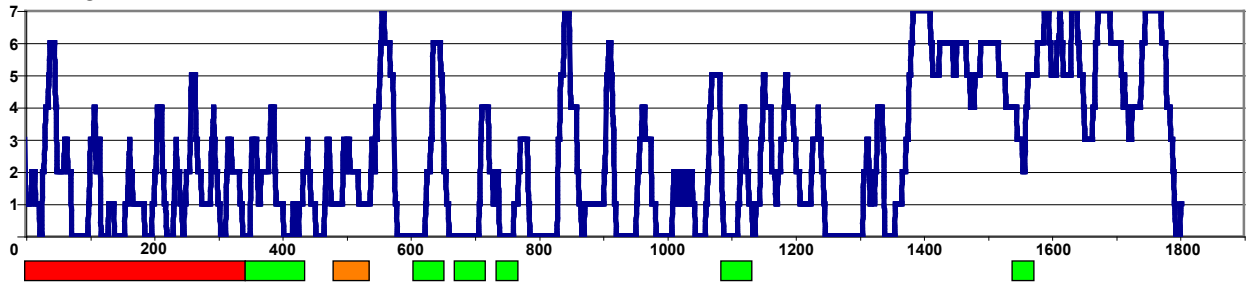

Kif13B

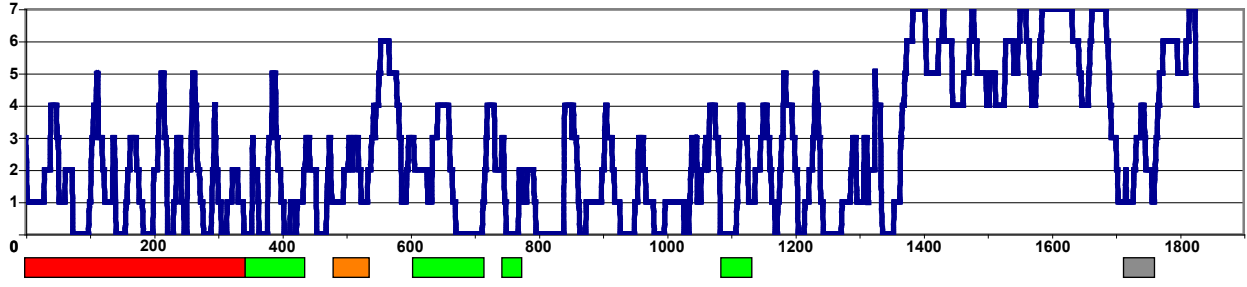

Kif16B

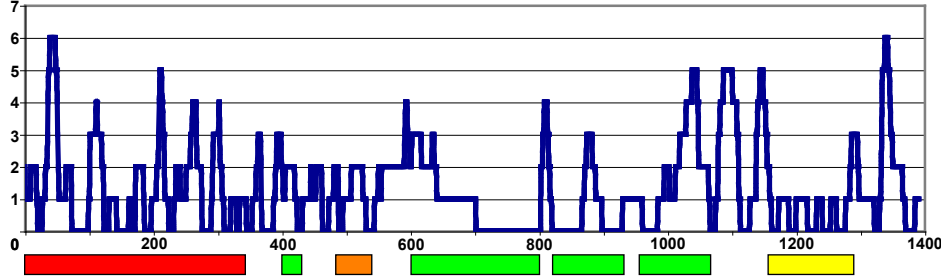

Kif14

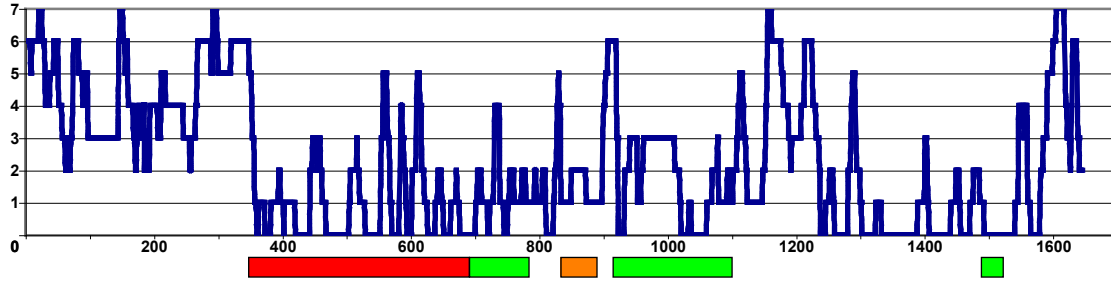

Residue

- = Motor
- = Coiled Coil
- = FHA
- = PH
- = PX
- = CAP-Gly

# Kinesin-4 Disorder Predictions

Disorder Prediction

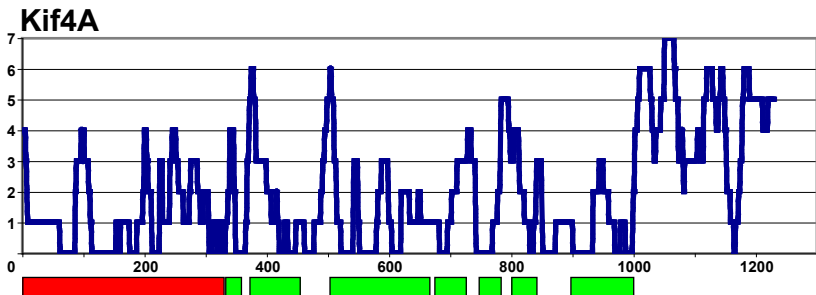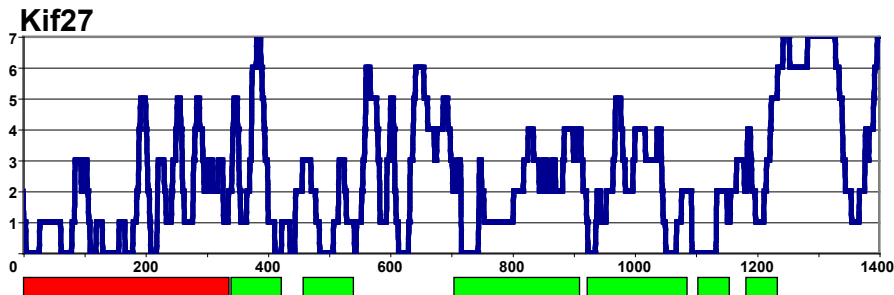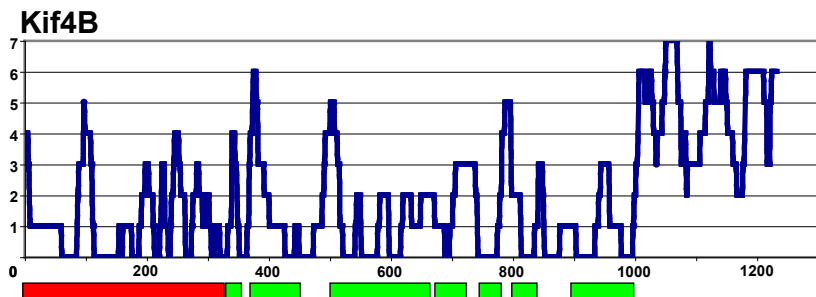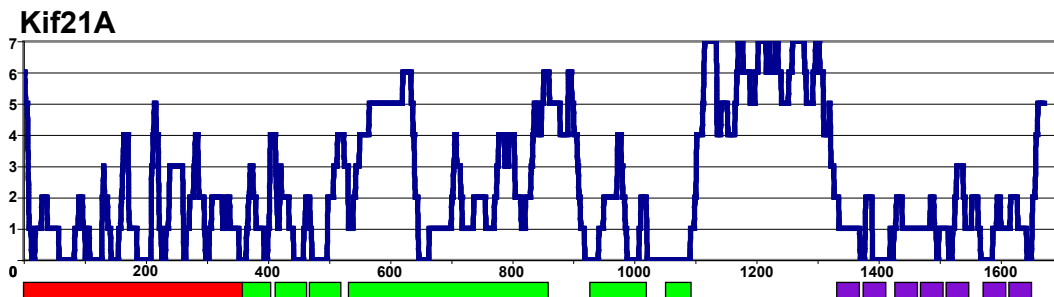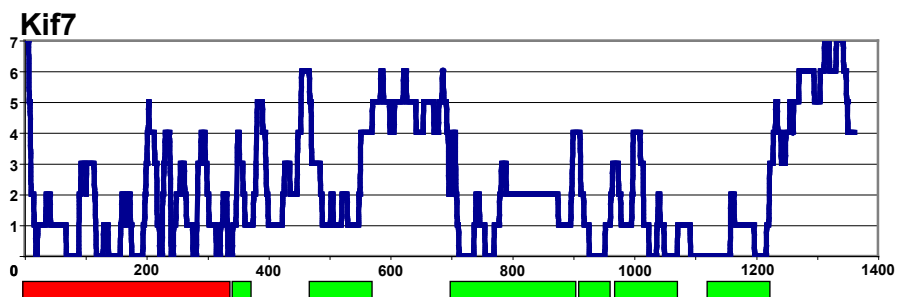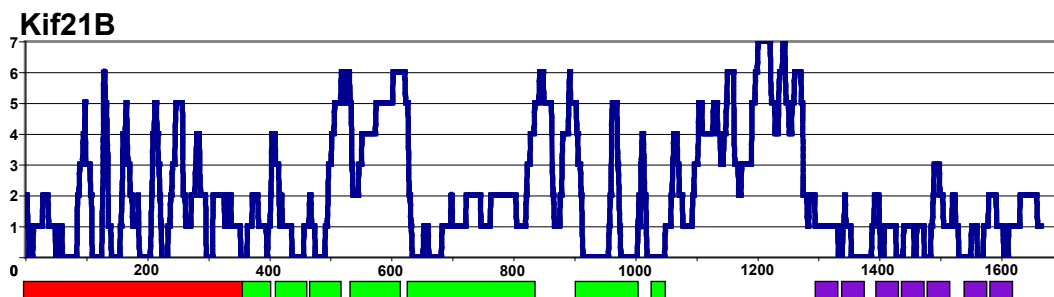

Residue

■ = Motor   ■ = Coiled Coil  
■ = WD40

# Kinesin-5 Disorder Predictions

Disorder Prediction

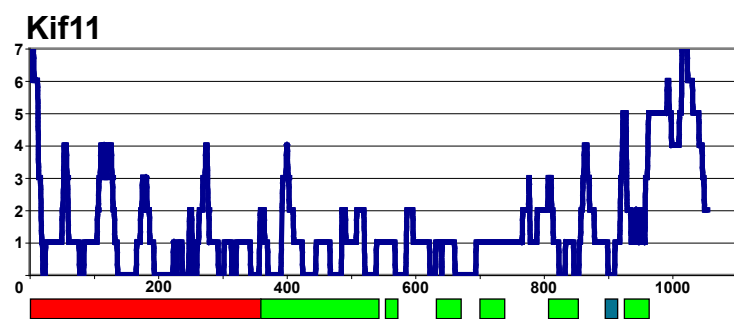

Residue

- = Motor
- = Coiled Coil
- = BimC Box

# Kinesin-6 Disorder Predictions

Disorder Prediction

### Kif20A

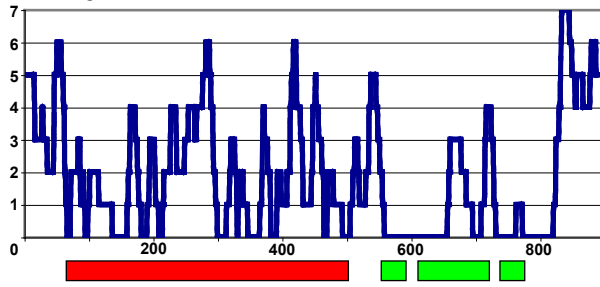

### Kif20B

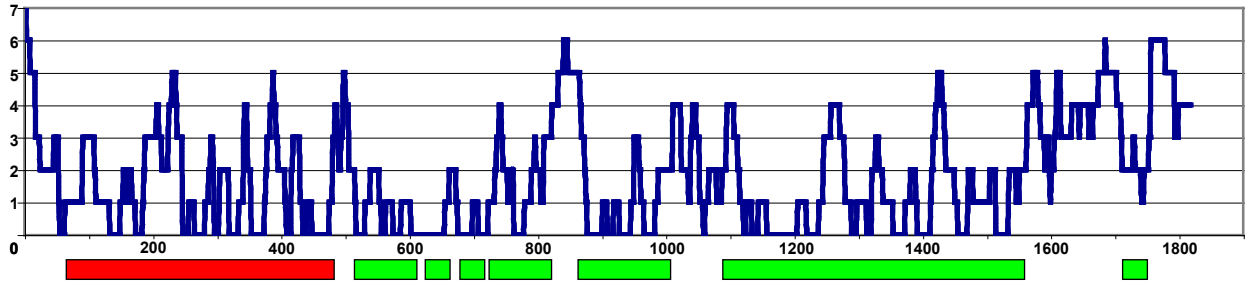

### Kif23

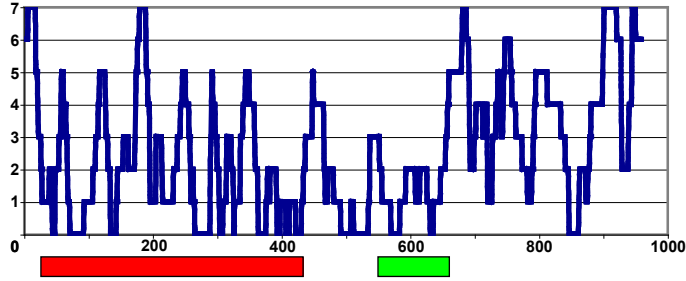

Residue

■ = Motor    ■ = Coiled Coil

# Kinesin-7 Disorder Predictions

Disorder Prediction

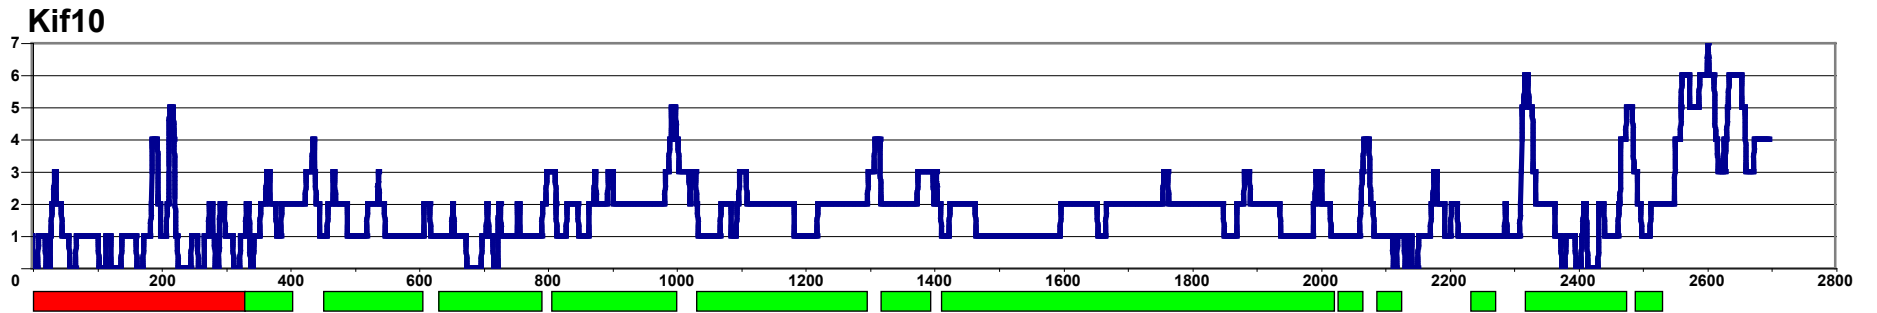



# Kinesin-8 Disorder Predictions

Disorder Prediction

### Kif18A

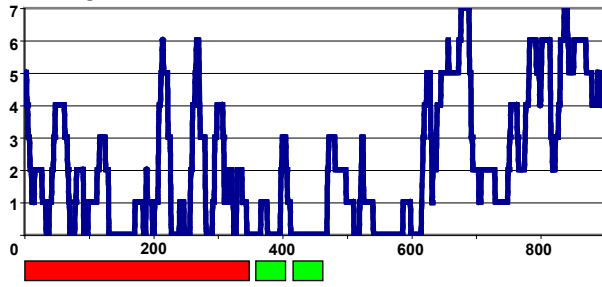

### Kif18B

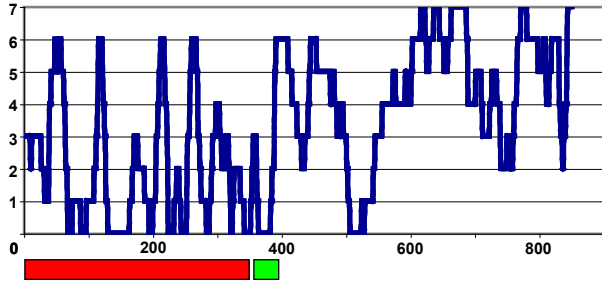

### Kif19

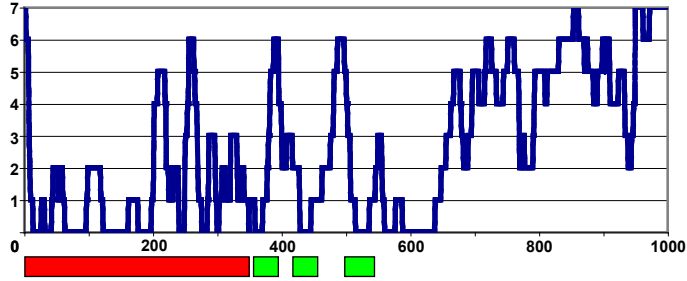

Residue

■ = Motor    ■ = Coiled Coil

# Kinesin-9 Disorder Predictions

Disorder Prediction

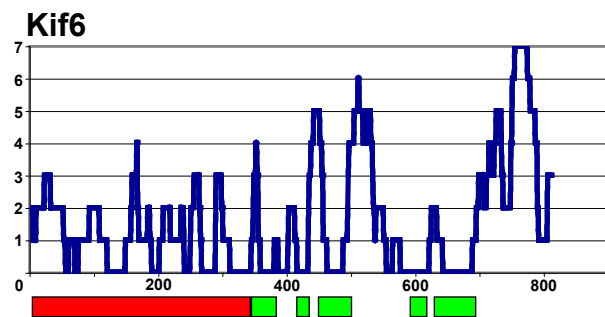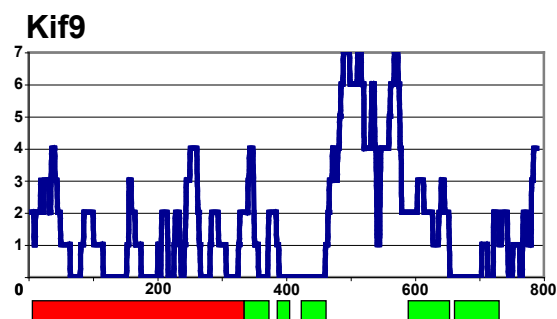

Residue

■ = Motor    ■ = Coiled Coil

# Kinesin-10 Disorder Predictions

Disorder Prediction

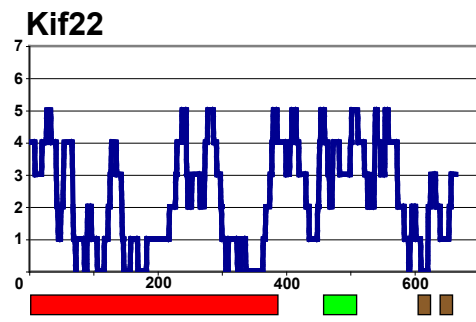

Residue

- = Motor
- = Coiled Coil
- = HhH

# Kinesin-11 Disorder Predictions

Disorder Prediction

Kif26A

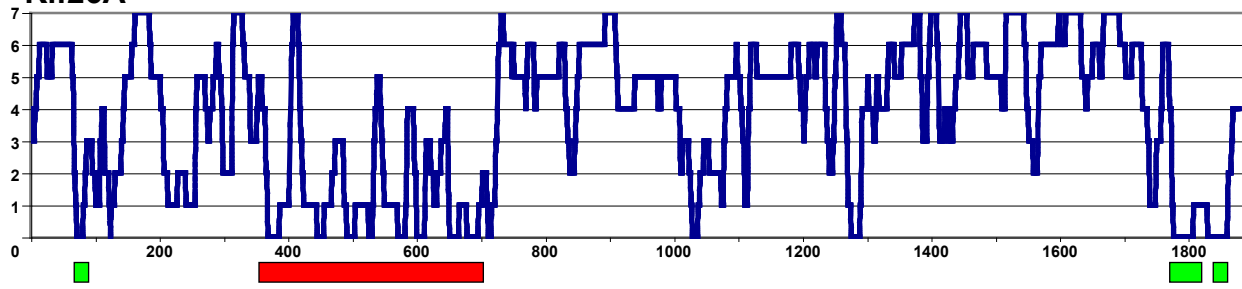

Kif26B

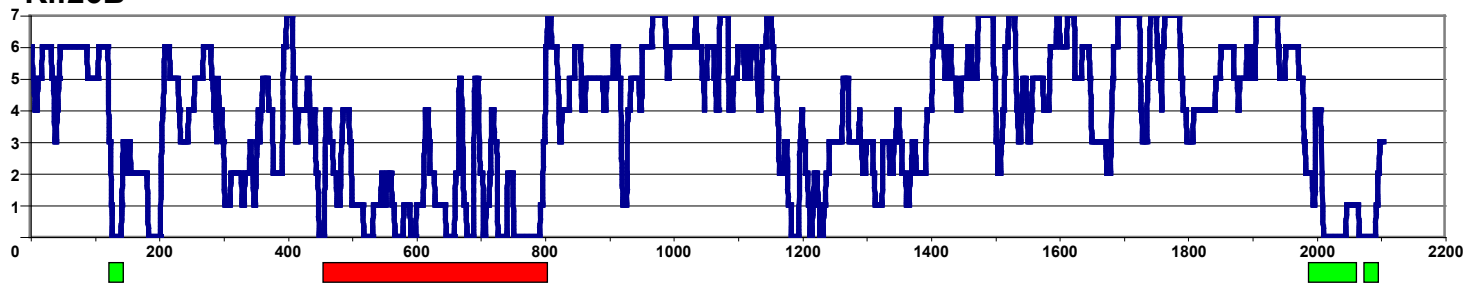

Residue

■ = Motor    ■ = Coiled Coil

# Kinesin-12 Disorder Predictions

Disorder Prediction

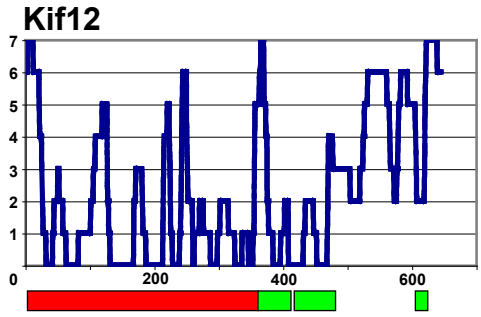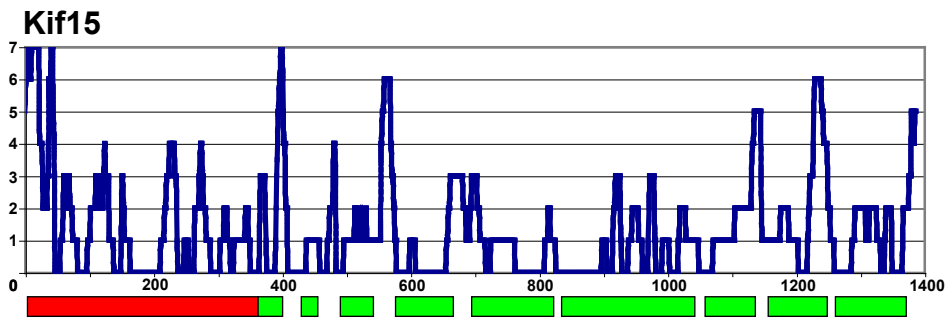

Residue

Motor Coiled Coil

# Kinesin-13 Disorder Predictions

Disorder Prediction

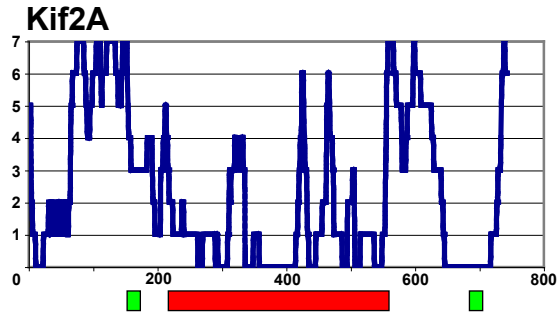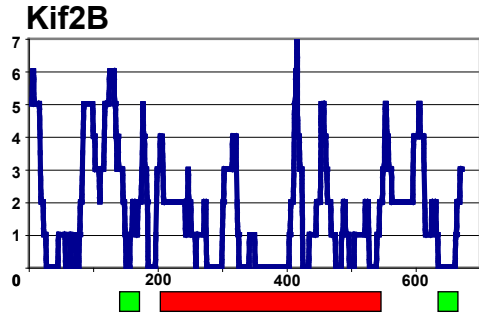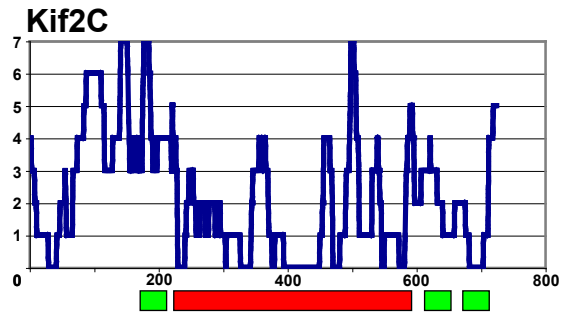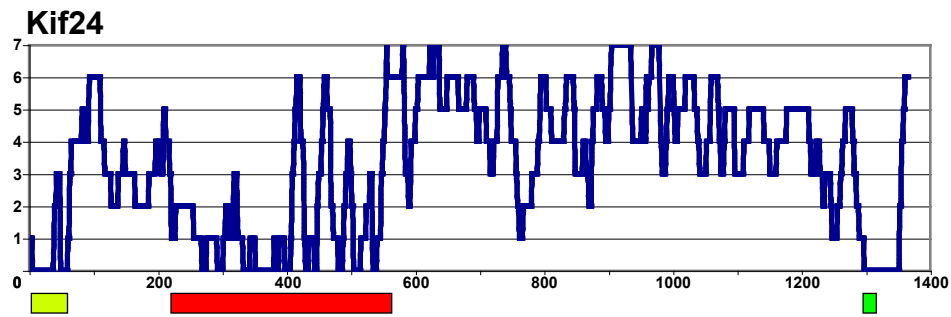

Residue

- = Motor
- = Coiled Coil
- = SAM

# Kinesin-14 Disorder Predictions

Disorder Prediction

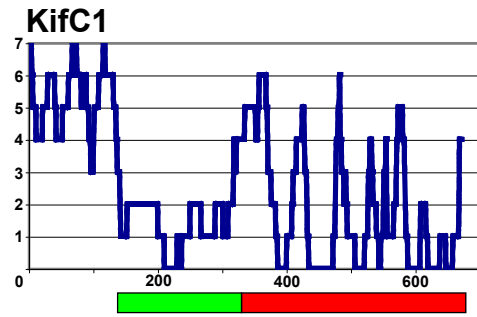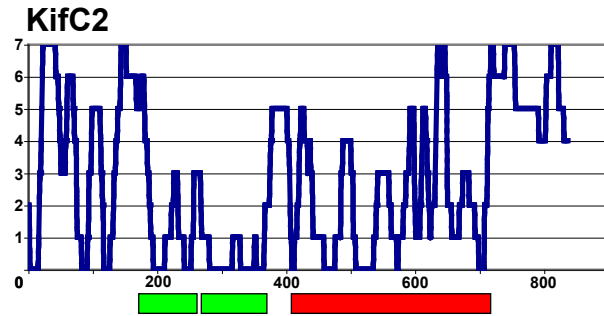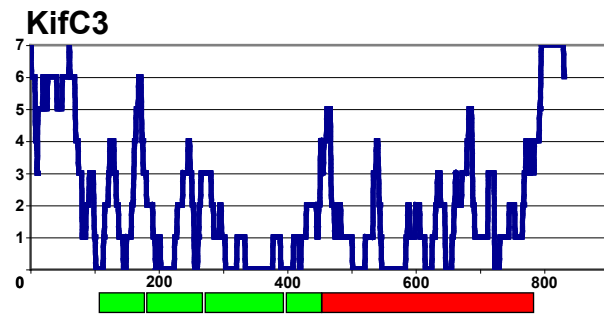

Residue

■ = Motor    ■ = Coiled Coil

**Table S1. Kinesin sequence conservation as classified by domain and by family.**

| <b>Family</b>                          | <b>Domain</b> | <b>% Identity</b> | <b>% Similarity</b> |
|----------------------------------------|---------------|-------------------|---------------------|
| <b>Kinesin 1</b>                       |               |                   |                     |
| Kif5A,5B,5C                            |               |                   |                     |
|                                        | Motor         | 81.8              | 96.7                |
|                                        | Stalk         | 57.7              | 83.2                |
|                                        | Tail          | 16.7              | 28.6                |
|                                        | Non-motor     | 58.3              | 73.3                |
|                                        | Total         | 68.6              | 88.9                |
| <b>Kineisn 2</b>                       |               |                   |                     |
| Kif3A,3B,3C,17                         |               |                   |                     |
|                                        | Motor         | 44                | 73.3                |
|                                        | Stalk         | 6.9               | 20.6                |
|                                        | Tail          | 2.6               | 19.8                |
|                                        | Non-motor     | 5.7               | 20.4                |
|                                        | Total         | 19.9              | 40.3                |
| Kif3A,3B,3C                            |               |                   |                     |
|                                        | Motor         | 52.8              | 82.5                |
|                                        | Stalk         | 26.2              | 60.3                |
|                                        | Tail          | 10.3              | 34.5                |
|                                        | Non-motor     | 19.9              | 50.1                |
|                                        | Total         | 35.6              | 65.6                |
| <b>Kinesin 3</b>                       |               |                   |                     |
| Kif1A,1Balpha,1Bbeta,1C,13A,13B,16B,14 |               |                   |                     |
|                                        | Motor         | 36.1              | 63.9                |
|                                        | Stalk         | 2.6               | 5.1                 |
|                                        | Total         | 9.3               | 18.5                |
| Kif1A,1Bbeta                           |               |                   |                     |
|                                        | Motor         | 87                | 96.1                |
|                                        | Stalk1        | 74.3              | 86.8                |
|                                        | FHA           | 71.4              | 92.1                |
|                                        | Stalk2        | 61.8              | 82.1                |
|                                        | PH            | 77.4              | 93                  |
|                                        | Non-motor     | 64.8              | 83.9                |
|                                        | Total         | 69.5              | 86.7                |
| Kif1Balpha,1C                          |               |                   |                     |
|                                        | Motor         | 82                | 97.8                |
|                                        | Stalk1        | 63.9              | 81.3                |
|                                        | FHA           | 64.1              | 84.9                |
|                                        | Stalk2        | 68.2              | 87.5                |
|                                        | Tail          | 28.6              | 52.2                |
|                                        | Non-motor     | 52.6              | 73.2                |
|                                        | Total         | 62.4              | 81.7                |



| <b>Family</b> | <b>Domain</b> | <b>% Identity</b> | <b>% Similarity</b> |
|---------------|---------------|-------------------|---------------------|
| Kif13A,13B    | Motor         | 81.1              | 95.3                |
|               | Stalk1        | 85.3              | 99.1                |
|               | FHA           | 56                | 82                  |
|               | Stalk2        | 52.3              | 81.8                |
|               | Tail/CAP-Gly  | 13                | 49.8                |
|               | Non-motor     | 47.5              | 77                  |
|               | Total         | 53.3              | 80.6                |

#### **Kinesin 4**

|                       |           |      |      |
|-----------------------|-----------|------|------|
| Kif4A,4B,7,27,21A,21B | Motor     | 31   | 59   |
|                       | Stalk     | 1.7  | 20   |
|                       | Tail      | 0.4  | 5.7  |
|                       | Non-motor | 1.5  | 17   |
|                       | Total     | 7.8  | 24.3 |
| Kif4A,4B              | Motor     | 97.3 | 100  |
|                       | Stalk     | 91.6 | 98.2 |
|                       | Tail      | 94.4 | 98.3 |
|                       | Non-motor | 92.4 | 98.2 |
|                       | Total     | 95.4 | 98.7 |
| Kif7,27               | Motor     | 60.6 | 86.8 |
|                       | Stalk     | 39.8 | 74.3 |
|                       | Tail      | 15.9 | 42.4 |
|                       | Non-motor | 33.7 | 64.9 |
|                       | Total     | 40.6 | 70.7 |
| Kif21A,21B            | Motor     | 75.2 | 92.2 |
|                       | Stalk     | 50   | 81.4 |
|                       | WD40      | 66.7 | 90   |
|                       | Non-motor | 54.3 | 83.7 |
|                       | Total     | 59   | 85.5 |

#### **Kinesin 5**

Kif11  
Single family member

#### **Kinesin 6**

|               |            |      |      |
|---------------|------------|------|------|
| Kif20A,20B,23 | N-terminus | 0    | 11.3 |
|               | Motor      | 24.5 | 58.7 |
|               | Stalk      | 1.5  | 10.7 |
|               | Tail       | 0    | 0    |
|               | Non-motor  | 1.3  | 9.6  |
|               | Total      | 7.1  | 22   |

| <b>Family</b>     | <b>Domain</b>        | <b>% Identity</b> | <b>% Similarity</b> |
|-------------------|----------------------|-------------------|---------------------|
| <b>Kinesin 7</b>  |                      |                   |                     |
| Kif10             | Single family member |                   |                     |
| <b>Kineisn 8</b>  |                      |                   |                     |
| Kif18A,18B,19     |                      |                   |                     |
|                   | Motor                | 37.5              | 71.3                |
|                   | Stalk                | 5.6               | 28.3                |
|                   | Tail                 | 2.2               | 18.4                |
|                   | Non-motor            | 3.3               | 21.4                |
|                   | Total                | 15.7              | 39.8                |
| <b>Kinesin 9</b>  |                      |                   |                     |
| Kif6,9            |                      |                   |                     |
|                   | Motor                | 41.6              | 81.9                |
|                   | Stalk                | 18.1              | 57.5                |
|                   | Tail                 | 11.5              | 42.4                |
|                   | Non-motor            | 16.4              | 53.4                |
|                   | Total                | 27.8              | 67.2                |
| <b>Kinesin 10</b> |                      |                   |                     |
| Kif22             | Single family member |                   |                     |
| <b>Kinesin 11</b> |                      |                   |                     |
| Kif26A,26B        |                      |                   |                     |
|                   | N-terminal tail      | 17.2              | 32.8                |
|                   | N-terminal stalk     | 30.1              | 62.3                |
|                   | Motor                | 67.7              | 90.4                |
|                   | C-terminal stalk     | 34.6              | 62.5                |
|                   | Non-motor            | 2.5               | 60.4                |
|                   | Total                | 38.8              | 65.9                |
| <b>Kinesin 12</b> |                      |                   |                     |
| Kif12,15          |                      |                   |                     |
|                   | Motor                | 33.4              | 66.6                |
|                   | Stalk                | 5.5               | 15.3                |
|                   | Total                | 13                | 29.8                |
| <b>Kineisn 13</b> |                      |                   |                     |
| Kif2A,2B,2C,24    |                      |                   |                     |
|                   | N-terminal tail      | 1.6               | 18.9                |
|                   | N-terminal stalk     | 4.2               | 28.2                |
|                   | Motor                | 15.6              | 45.6                |
|                   | C-terminal stalk     | 0.2               | 2.9                 |
|                   | Non-motor            | 0.7               | 7.4                 |
|                   | Total                | 4.5               | 17.2                |

| <b><u>Family</u></b> | <b><u>Domain</u></b> | <b><u>% Identity</u></b> | <b><u>% Similarity</u></b> |
|----------------------|----------------------|--------------------------|----------------------------|
| Kif2A,2B,2C          |                      |                          |                            |
|                      | N-terminal tail      | 15.1                     | 33.5                       |
|                      | N-terminal stalk     | 23.9                     | 60.6                       |
|                      | Motor                | 65.9                     | 89.7                       |
|                      | C-terminal stalk     | 6.8                      | 37                         |
|                      | Non-motor            | 13.7                     | 39.6                       |
|                      | Total                | 38.5                     | 64                         |

**Kinesin 14**

KifC1,C2,C3

|           |      |      |
|-----------|------|------|
| Tail      | 1.6  | 15.1 |
| Stalk     | 4.7  | 23.5 |
| Motor     | 27.8 | 54.7 |
| Non-motor | 3.3  | 18.4 |
| Total     | 13.2 | 34.6 |

**Table S2. Locations, lengths, and pIs of predicted kinesin ID regions.**

| Isoform          | 3 Algorithm Consensus |        | Domain | Length | % Motor ID | % Stalk ID | % Tail ID | % Total ID | pI            | Domains     | Predicted % Domain Coiled-Coil | Domain pI |
|------------------|-----------------------|--------|--------|--------|------------|------------|-----------|------------|---------------|-------------|--------------------------------|-----------|
|                  | ID Start              | ID End |        |        |            |            |           |            |               |             |                                |           |
| <b>Kinesin-1</b> |                       |        |        |        |            |            |           |            |               |             |                                |           |
| Kif5A            | 1                     | 8 m    | 7      | 10.2   | 12.5       | 85.3       | 20.8      | 3.79       | 1-333 Motor   | 65.2        | 6.52 m                         |           |
|                  | 87                    | 98 m   | 11     |        |            |            |           | 6.75       | 334-372 CC    |             | 5.32 s                         |           |
|                  | 192                   | 200 m  | 8      |        |            |            |           | 5.24       | 412-538 CC    |             | 7.03 t                         |           |
|                  | 239                   | 247 m  | 8      |        |            |            |           | 5.97       | 657-787 CC    |             | 5.65 total                     |           |
|                  | 366                   | 413 s  | 47     |        |            |            |           | 4.15       | 825-902 CC    |             |                                |           |
|                  | 684                   | 691 s  | 7      |        |            |            |           | 3.84       | 334-902 Stalk |             |                                |           |
|                  | 811                   | 828 s  | 17     |        |            |            |           | 4.83       | 903-1032 Tail |             |                                |           |
|                  | 907                   | 944 t  | 37     |        |            |            |           | 10.18      |               |             |                                |           |
|                  | 959                   | 1032 t | 73     |        |            |            |           | 4.12       |               |             |                                |           |
|                  | Kif5B                 | 1      | 3 m    | 2      | 10.7       | 8.8        | 100       | 14.5       | 3.8           |             | 1-336 Motor                    | 72.1      |
| 84               |                       | 101 m  | 17     |        |            |            |           | 6.92       | 337-367 CC    | 5.52 s      |                                |           |
| 188              |                       | 198 m  | 10     |        |            |            |           | 9.49       | 415-542 CC    | 12.7 t      |                                |           |
| 235              |                       | 242 m  | 7      |        |            |            |           | 8.31       | 617-791 CC    | 6.12 total  |                                |           |
| 368              |                       | 375 s  | 7      |        |            |            |           | 6          | 827-906 CC    |             |                                |           |
| 569              |                       | 580 s  | 11     |        |            |            |           | 4.37       | 337-906 Stalk |             |                                |           |
| 607              |                       | 624 s  | 17     |        |            |            |           | 6.28       | 907-963 Tail  |             |                                |           |
| 812              |                       | 827 s  | 15     |        |            |            |           | 4.23       |               |             |                                |           |
| 907              |                       | 963 t  | 56     |        |            |            |           | 12.7       |               |             |                                |           |
| Kif5C            |                       | 1      | 3 m    | 2      | 9.3        | 11.7       | 97.9      | 15.2       | 3.8           | 1-333 Motor | 64.4                           |           |
|                  | 84                    | 100 m  | 16     |        |            |            |           | 8.55       | 334-369 CC    | 5.17 s      |                                |           |
|                  | 193                   | 197 m  | 4      |        |            |            |           | 5.49       | 411-519 CC    | 11.85 t     |                                |           |
|                  | 237                   | 245 m  | 8      |        |            |            |           | 6.24       | 645-792 CC    | 5.86 total  |                                |           |
|                  | 278                   | 279 m  | 1      |        |            |            |           | 5.95       | 829-908 CC    |             |                                |           |
|                  | 367                   | 396 s  | 29     |        |            |            |           | 4.44       | 334-908 Stalk |             |                                |           |
|                  | 402                   | 411 s  | 9      |        |            |            |           | 5.52       | 909-957 Tail  |             |                                |           |
|                  | 604                   | 618 s  | 14     |        |            |            |           | 9.99       |               |             |                                |           |
|                  | 780                   | 781 s  | 1      |        |            |            |           | 9.79       |               |             |                                |           |
|                  | 816                   | 830 s  | 14     |        |            |            |           | 3.37       |               |             |                                |           |
| 910              | 957 t                 | 47     |        |        |            |            | 11.59     |            |               |             |                                |           |
| <b>Kinesin-2</b> |                       |        |        |        |            |            |           |            |               |             |                                |           |
| Kif3A            | 1                     | 13 m   | 12     | 19.7   | 27.4       | 45.6       | 26.4      | 4.68       | 1-356 Motor   | 82.6        | 8.78 m                         |           |
|                  | 47                    | 60 m   | 13     |        |            |            |           | 6.42       | 357-381 CC    |             | 4.98 s                         |           |
|                  | 162                   | 163 m  | 1      |        |            |            |           | 8.75       | 421-587 CC    |             | 9.02 t                         |           |
|                  | 201                   | 214 m  | 13     |        |            |            |           | 11         | 357-587 Stalk |             | 6.16 total                     |           |
|                  | 252                   | 261 m  | 9      |        |            |            |           | 8.79       | 588-702 Tail  |             |                                |           |
|                  | 296                   | 299 m  | 3      |        |            |            |           | 9.18       |               |             |                                |           |
|                  | 309                   | 312 m  | 3      |        |            |            |           | 5.24       |               |             |                                |           |
|                  | 342                   | 357 m  | 15     |        |            |            |           | 9.53       |               |             |                                |           |
|                  | 373                   | 436 s  | 63     |        |            |            |           | 4.68       |               |             |                                |           |
|                  | 623                   | 644 t  | 21     |        |            |            |           | 9.4        |               |             |                                |           |
| 662              | 693 t                 | 31     |        |        |            |            | 12.02     |            |               |             |                                |           |
| Kif3B            | 1                     | 8 m    | 7      | 19.9   | 20.4       | 60.4       | 28.9      | 8.35       | 1-351 Motor   | 63.5        | 9.13 m                         |           |
|                  | 46                    | 53 m   | 7      |        |            |            |           | 7.17       | 352-373 CC    |             | 5.25 s                         |           |
|                  | 104                   | 112 m  | 8      |        |            |            |           | 4.37       | 435-463 CC    |             | 9.33 t                         |           |
|                  | 162                   | 167 m  | 5      |        |            |            |           | 9.99       | 485-582 CC    |             | 7.3 total                      |           |
|                  | 197                   | 209 m  | 12     |        |            |            |           | 9.75       | 352-582 Stalk |             |                                |           |
|                  | 230                   | 232 m  | 2      |        |            |            |           | 3.8        | 583-747 Tail  |             |                                |           |
|                  | 249                   | 260 m  | 11     |        |            |            |           | 5.86       |               |             |                                |           |
|                  | 293                   | 296 m  | 3      |        |            |            |           | 8.75       |               |             |                                |           |
|                  | 336                   | 351 m  | 15     |        |            |            |           | 10.45      |               |             |                                |           |
|                  | 373                   | 420 s  | 47     |        |            |            |           | 4.52       |               |             |                                |           |
| 617              | 642 t                 | 25     |        |        |            |            | 11        |            |               |             |                                |           |
| 648              | 650 t                 | 2      |        |        |            |            | 9.5       |            |               |             |                                |           |
| 665              | 681 t                 | 16     |        |        |            |            | 4.56      |            |               |             |                                |           |
| 692              | 748 t                 | 56     |        |        |            |            | 9.6       |            |               |             |                                |           |
| Kif3C            | 1                     | 8 m    | 7      | 26     | 26.7       | 58.9       | 32.9      | 10         | 1-377 Motor   | 78.9        | 8.84 m                         |           |
|                  | 46                    | 53 m   | 7      |        |            |            |           | 6          | 378-397 CC    |             | 5.77 s                         |           |
|                  | 103                   | 107 m  | 4      |        |            |            |           | 8.59       | 450-629 CC    |             | 8.96 t                         |           |
|                  | 160                   | 164 m  | 4      |        |            |            |           | 8.85       | 378-629 Stalk |             | 8.28 total                     |           |
|                  | 202                   | 210 m  | 8      |        |            |            |           | 9.76       | 630-793 Tail  |             |                                |           |
|                  | 230                   | 235 m  | 5      |        |            |            |           | 3.56       |               |             |                                |           |
|                  | 248                   | 290 m  | 42     |        |            |            |           | 8.63       |               |             |                                |           |
|                  | 316                   | 321 m  | 5      |        |            |            |           | 9          |               |             |                                |           |
|                  | 362                   | 378 m  | 16     |        |            |            |           | 8.47       |               |             |                                |           |
|                  | 397                   | 427 s  | 30     |        |            |            |           | 12.31      |               |             |                                |           |
| 432              | 459 s                 | 27     |        |        |            |            | 4.16      |            |               |             |                                |           |
| 548              | 558 s                 | 10     |        |        |            |            | 8.84      |            |               |             |                                |           |
| 664              | 687 t                 | 23     |        |        |            |            | 11.17     |            |               |             |                                |           |
| 699              | 702 t                 | 3      |        |        |            |            | 6.74      |            |               |             |                                |           |
| 723              | 793 t                 | 70     |        |        |            |            | 7.18      |            |               |             |                                |           |
| Kif17            | 43                    | 51 m   | 8      | 13.3   | 48.8       | 51.3       | 37.2      | 4.37       | 1-346 Motor   | 20.8        | 8.01 m                         |           |
|                  | 94                    | 110 m  | 16     |        |            |            |           | 5.84       | 347-366 CC    |             | 4.62 s                         |           |
|                  | 244                   | 255 m  | 11     |        |            |            |           | 5.86       | 402-461 CC    |             | 9.45 t                         |           |
|                  | 334                   | 345 m  | 11     |        |            |            |           | 8.75       | 813-837 CC    |             | 5.38 total                     |           |
|                  | 372                   | 399 s  | 27     |        |            |            |           | 4.68       | 347-837 Stalk |             |                                |           |
|                  | 404                   | 405 s  | 1      |        |            |            |           | 4          | 838-1029 Tail |             |                                |           |
|                  | 421                   | 422 s  | 1      |        |            |            |           | 8.75       |               |             |                                |           |
|                  | 431                   | 437 s  | 6      |        |            |            |           | 4.68       |               |             |                                |           |
|                  | 495                   | 578 s  | 83     |        |            |            |           | 4.37       |               |             |                                |           |
|                  | 587                   | 613 s  | 26     |        |            |            |           | 4.09       |               |             |                                |           |
| 623              | 677 s                 | 54     |        |        |            |            | 4.14      |            |               |             |                                |           |
| 697              | 700 s                 | 3      |        |        |            |            | 5.57      |            |               |             |                                |           |
| 705              | 724 s                 | 19     |        |        |            |            | 4.79      |            |               |             |                                |           |
| 730              | 735 s                 | 5      |        |        |            |            | 3.56      |            |               |             |                                |           |
| 756              | 770 s                 | 14     |        |        |            |            | 10.17     |            |               |             |                                |           |
| 901              | 934 t                 | 33     |        |        |            |            | 4.86      |            |               |             |                                |           |
| 964              | 1029 t                | 65     |        |        |            |            | 10.01     |            |               |             |                                |           |
| <b>Kinesin-3</b> |                       |        |        |        |            |            |           |            |               |             |                                |           |
| Kif1A            | 1                     | 2 m    | 1      | 16.9   | 24.8       | 37.7       | 30.8      | 5.28       | 1-362 Motor   | 42.5        | 8.6 m                          |           |
|                  | 36                    | 45 m   | 9      |        |            |            |           | 8.26       | 431-460 CC    |             | 5.09 s                         |           |
|                  | 59                    | 61 m   | 2      |        |            |            |           | 6.74       | 515-572 FHA   |             | 5.93 t                         |           |
|                  | 105                   | 110 m  | 5      |        |            |            |           | 8.59       | 632-681 CC    |             | 5.86 total                     |           |
|                  | 204                   | 211 m  | 7      |        |            |            |           | 5.19       | 363-681 Stalk |             |                                |           |

|            |      |        |     |      |      |      |      |       |               |            |
|------------|------|--------|-----|------|------|------|------|-------|---------------|------------|
|            | 232  | 237 m  | 5   |      |      |      |      | 4     | 1576-1675 PH  |            |
|            | 248  | 266 m  | 18  |      |      |      |      | 4.03  | 682-1690 Tail |            |
|            | 287  | 301 m  | 14  |      |      |      |      | 10    |               |            |
|            | 391  | 412 s  | 21  |      |      |      |      | 3.8   |               |            |
|            | 422  | 430 s  | 8   |      |      |      |      | 6.1   |               |            |
|            | 481  | 496 s  | 15  |      |      |      |      | 10    |               |            |
|            | 519  | 525 s  | 6   |      |      |      |      | 4.68  |               |            |
|            | 547  | 555 s  | 8   |      |      |      |      | 5.72  |               |            |
|            | 597  | 617 s  | 20  |      |      |      |      | 4.65  |               |            |
|            | 633  | 634 s  | 1   |      |      |      |      | 3.8   |               |            |
|            | 679  | 697 t  | 18  |      |      |      |      | 3.59  |               |            |
|            | 759  | 778 t  | 19  |      |      |      |      | 4.78  |               |            |
|            | 830  | 837 t  | 7   |      |      |      |      | 3.8   |               |            |
|            | 892  | 989 t  | 97  |      |      |      |      | 4.04  |               |            |
|            | 1032 | 1044 t | 12  |      |      |      |      | 8.79  |               |            |
|            | 1082 | 1130 t | 48  |      |      |      |      | 10.9  |               |            |
|            | 1205 | 1212 t | 7   |      |      |      |      | 3.57  |               |            |
|            | 1331 | 1345 t | 14  |      |      |      |      | 12    |               |            |
|            | 1361 | 1363 t | 2   |      |      |      |      | 5.52  |               |            |
|            | 1403 | 1447 t | 44  |      |      |      |      | 4.54  |               |            |
|            | 1462 | 1565 t | 103 |      |      |      |      | 5.63  |               |            |
|            | 1681 | 1690 t | 9   |      |      |      |      | 12.48 |               |            |
| Kif1Balpha |      |        |     |      |      |      |      |       |               |            |
|            | 37   | 44 m   | 7   | 12.9 | 33.1 | 94.3 | 42.5 | 10    | 1-356 Motor   | 8.03 m     |
|            | 59   | 68 m   | 9   |      |      |      |      | 4.35  | 361-379 CC    | 5.66 s     |
|            | 105  | 110 m  | 5   |      |      |      |      | 8.59  | 425-453 CC    | 10.16 t    |
|            | 208  | 210 m  | 2   |      |      |      |      | 5.19  | 509-566 FHA   | 8.66 total |
|            | 231  | 237 m  | 6   |      |      |      |      | 3.67  | 627-656 CC    |            |
|            | 255  | 266 m  | 11  |      |      |      |      | 9.99  | 815-856 CC    |            |
|            | 290  | 292 m  | 2   |      |      |      |      | 10.3  | 357-856 Stalk | 34.7       |
|            | 355  | 359 m  | 4   |      |      |      |      | 3.67  | 857-1153 Tail |            |
|            | 381  | 409 s  | 28  |      |      |      |      | 3.56  |               |            |
|            | 414  | 429 s  | 15  |      |      |      |      | 4.09  |               |            |
|            | 472  | 488 s  | 16  |      |      |      |      | 6.85  |               |            |
|            | 543  | 544 s  | 1   |      |      |      |      | 5.52  |               |            |
|            | 568  | 571 s  | 3   |      |      |      |      | 5.52  |               |            |
|            | 589  | 611 s  | 22  |      |      |      |      | 5.02  |               |            |
|            | 623  | 628 s  | 5   |      |      |      |      | 5.84  |               |            |
|            | 654  | 673 s  | 19  |      |      |      |      | 4.04  |               |            |
|            | 691  | 693 s  | 2   |      |      |      |      | 8.47  |               |            |
|            | 698  | 727 s  | 29  |      |      |      |      | 10.7  |               |            |
|            | 777  | 783 s  | 6   |      |      |      |      | 4.56  |               |            |
|            | 798  | 814 s  | 16  |      |      |      |      | 4.32  |               |            |
|            | 858  | 916 t  | 58  |      |      |      |      | 6.79  |               |            |
|            | 926  | 975 t  | 49  |      |      |      |      | 12.13 |               |            |
|            | 981  | 1153 t | 172 |      |      |      |      | 9.51  |               |            |
| Kif1Bbeta  |      |        |     |      |      |      |      |       |               |            |
|            | 1    | 2 m    | 1   | 16.3 | 36.5 | 45.2 | 37   | 5.28  | 1-362 Motor   | 8.03 m     |
|            | 37   | 45 m   | 8   |      |      |      |      | 8.59  | 367-385 CC    | 5.11 s     |
|            | 59   | 68 m   | 9   |      |      |      |      | 4.35  | 471-499 CC    | 5.31 t     |
|            | 105  | 110 m  | 5   |      |      |      |      | 8.59  | 555-612 FHA   | 5.39 total |
|            | 162  | 165 m  | 3   |      |      |      |      | 8.75  | 672-722 CC    |            |
|            | 206  | 211 m  | 5   |      |      |      |      | 5.57  | 841-862 CC    |            |
|            | 231  | 237 m  | 6   |      |      |      |      | 3.67  | 363-862 Stalk | 34.9       |
|            | 255  | 266 m  | 11  |      |      |      |      | 9.99  | 1702-1801 PH  |            |
|            | 289  | 300 m  | 11  |      |      |      |      | 10    | 863-1823 Tail |            |
|            | 388  | 409 s  | 21  |      |      |      |      | 5.18  |               |            |
|            | 423  | 455 s  | 32  |      |      |      |      | 4.64  |               |            |
|            | 461  | 469 s  | 8   |      |      |      |      | 4     |               |            |
|            | 520  | 539 s  | 19  |      |      |      |      | 6.92  |               |            |
|            | 587  | 622 s  | 35  |      |      |      |      | 4.88  |               |            |
|            | 635  | 659 s  | 24  |      |      |      |      | 4.82  |               |            |
|            | 672  | 674 s  | 2   |      |      |      |      | 4     |               |            |
|            | 718  | 739 s  | 21  |      |      |      |      | 6.18  |               |            |
|            | 800  | 820 s  | 20  |      |      |      |      | 6.21  |               |            |
|            | 859  | 880 t  | 21  |      |      |      |      | 3.66  |               |            |
|            | 905  | 919 t  | 14  |      |      |      |      | 3.71  |               |            |
|            | 927  | 965 t  | 38  |      |      |      |      | 10.26 |               |            |
|            | 1014 | 1030 t | 16  |      |      |      |      | 4.35  |               |            |
|            | 1041 | 1111 t | 70  |      |      |      |      | 5.13  |               |            |
|            | 1144 | 1162 t | 18  |      |      |      |      | 5.73  |               |            |
|            | 1200 | 1247 t | 47  |      |      |      |      | 4.97  |               |            |
|            | 1323 | 1331 t | 8   |      |      |      |      | 8.75  |               |            |
|            | 1345 | 1349 t | 4   |      |      |      |      | 5.08  |               |            |
|            | 1369 | 1373 t | 4   |      |      |      |      | 9.75  |               |            |
|            | 1417 | 1437 t | 20  |      |      |      |      | 6.18  |               |            |
|            | 1448 | 1460 t | 12  |      |      |      |      | 4.32  |               |            |
|            | 1518 | 1576 t | 58  |      |      |      |      | 4.67  |               |            |
|            | 1595 | 1687 t | 92  |      |      |      |      | 7.83  |               |            |
|            | 1802 | 1823 t | 21  |      |      |      |      | 11.01 |               |            |
| Kif1C      |      |        |     |      |      |      |      |       |               |            |
|            | 1    | 2 m    | 1   | 15.2 | 35.2 | 89.2 | 40   | 5.28  | 1-356 Motor   | 8.07 m     |
|            | 22   | 23 m   | 1   |      |      |      |      | 3.8   | 360-379 CC    | 5.25 s     |
|            | 36   | 46 m   | 10  |      |      |      |      | 8.31  | 438-479 CC    | 10.27 t    |
|            | 59   | 68 m   | 9   |      |      |      |      | 4.35  | 522-575 FHA   | 6.47 total |
|            | 103  | 112 m  | 9   |      |      |      |      | 8.59  | 638-669 CC    |            |
|            | 205  | 212 m  | 7   |      |      |      |      | 4     | 828-871 CC    |            |
|            | 232  | 235 m  | 3   |      |      |      |      | 5.52  | 357-871 Stalk | 36.4       |
|            | 255  | 266 m  | 11  |      |      |      |      | 10.84 | 872-1103 Tail |            |
|            | 290  | 293 m  | 3   |      |      |      |      | 11.17 |               |            |
|            | 380  | 445 s  | 65  |      |      |      |      | 4.37  |               |            |
|            | 487  | 501 s  | 14  |      |      |      |      | 10    |               |            |
|            | 601  | 623 s  | 22  |      |      |      |      | 4.59  |               |            |
|            | 668  | 684 s  | 16  |      |      |      |      | 4.28  |               |            |
|            | 696  | 722 s  | 26  |      |      |      |      | 11.56 |               |            |
|            | 732  | 740 s  | 8   |      |      |      |      | 11.71 |               |            |
|            | 788  | 795 s  | 7   |      |      |      |      | 4.21  |               |            |
|            | 806  | 829 s  | 23  |      |      |      |      | 3.9   |               |            |
|            | 872  | 922 t  | 50  |      |      |      |      | 3.88  |               |            |
|            | 947  | 1103 t | 156 |      |      |      |      | 11.62 |               |            |
| Kif13A     |      |        |     |      |      |      |      |       |               |            |
|            | 1    | 2 m    | 1   | 20.6 | 35.9 | 89.5 | 40.4 | 5.28  | 1-360 Motor   | 8.38 m     |
|            | 32   | 50 m   | 18  |      |      |      |      | 9.99  | 361-437 CC    | 5.26 s     |
|            | 63   | 67 m   | 4   |      |      |      |      | 3.67  | 469-519 FHA   | 5.2 t      |
|            | 103  | 118 m  | 15  |      |      |      |      | 6.75  | 602-640 CC    | 5.43 total |
|            | 207  | 215 m  | 8   |      |      |      |      | 9.75  | 664-705 CC    |            |
|            | 259  | 270 m  | 11  |      |      |      |      | 9.99  | 742-775 CC    |            |

|           |      |        |     |      |      |      |      |       |                   |            |
|-----------|------|--------|-----|------|------|------|------|-------|-------------------|------------|
|           | 292  | 297 m  | 5   |      |      |      |      | 8.75  | 1099-1138 CC      |            |
|           | 318  | 323 m  | 5   |      |      |      |      | 5.52  | 1517-1547 CC      |            |
|           | 355  | 362 m  | 7   |      |      |      |      | 4.32  | 361-1547 Stalk    | 25.9       |
|           | 382  | 390 s  | 8   |      |      |      |      | 5.72  | 1548-1805 Tail    |            |
|           | 473  | 475 s  | 2   |      |      |      |      | 3.8   |                   |            |
|           | 498  | 507 s  | 9   |      |      |      |      | 4.21  |                   |            |
|           | 542  | 577 s  | 35  |      |      |      |      | 4.87  |                   |            |
|           | 634  | 654 s  | 20  |      |      |      |      | 5.96  |                   |            |
|           | 712  | 725 s  | 13  |      |      |      |      | 12.01 |                   |            |
|           | 774  | 785 s  | 11  |      |      |      |      | 4.68  |                   |            |
|           | 833  | 861 s  | 28  |      |      |      |      | 3.58  |                   |            |
|           | 907  | 919 s  | 12  |      |      |      |      | 4.03  |                   |            |
|           | 960  | 978 s  | 18  |      |      |      |      | 6.75  |                   |            |
|           | 1068 | 1087 s | 19  |      |      |      |      | 3.72  |                   |            |
|           | 1118 | 1125 s | 7   |      |      |      |      | 4.68  |                   |            |
|           | 1149 | 1165 s | 16  |      |      |      |      | 3.8   |                   |            |
|           | 1180 | 1203 s | 23  |      |      |      |      | 4.02  |                   |            |
|           | 1230 | 1242 s | 12  |      |      |      |      | 5.98  |                   |            |
|           | 1314 | 1316 s | 2   |      |      |      |      | 4     |                   |            |
|           | 1330 | 1340 s | 10  |      |      |      |      | 4     |                   |            |
|           | 1375 | 1556 s | 181 |      |      |      |      | 5.91  |                   |            |
|           | 1561 | 1791 t | 230 |      |      |      |      | 5.61  |                   |            |
| Kif13B    |      |        |     |      |      |      |      |       |                   |            |
|           | 1    | 2 m    | 1   | 18.8 | 27.6 | 69   | 41.4 | 5.28  | 1-361 Motor       | 7.58 m     |
|           | 41   | 52 m   | 11  |      |      |      |      | 8.75  | 364-439 CC        | 5.22 s     |
|           | 105  | 121 m  | 16  |      |      |      |      | 5.5   | 470-520 FHA       | 5.79 t     |
|           | 138  | 140 m  | 2   |      |      |      |      | 3.8   | 607-710 CC        | 5.56 total |
|           | 165  | 174 m  | 9   |      |      |      |      | 12.02 | 752-772 CC        |            |
|           | 208  | 221 m  | 13  |      |      |      |      | 6.14  | 1096-1141 CC      |            |
|           | 238  | 243 m  | 5   |      |      |      |      | 5.83  | 363-1141 Stalk    | 34         |
|           | 260  | 269 m  | 9   |      |      |      |      | 8.79  | 1721-1763 CAP-Gly |            |
|           | 296  | 298 m  | 2   |      |      |      |      | 8.75  | 1142-1828 Tail    |            |
|           | 381  | 394 s  | 13  |      |      |      |      | 8.5   |                   |            |
|           | 439  | 444 s  | 5   |      |      |      |      | 8.75  |                   |            |
|           | 475  | 477 s  | 2   |      |      |      |      | 5.24  |                   |            |
|           | 506  | 520 s  | 14  |      |      |      |      | 11    |                   |            |
|           | 541  | 587 s  | 46  |      |      |      |      | 4.5   |                   |            |
|           | 599  | 607 s  | 8   |      |      |      |      | 5.84  |                   |            |
|           | 636  | 663 s  | 27  |      |      |      |      | 9.5   |                   |            |
|           | 720  | 733 s  | 13  |      |      |      |      | 10.84 |                   |            |
|           | 745  | 747 s  | 2   |      |      |      |      | 8.75  |                   |            |
|           | 842  | 861 s  | 19  |      |      |      |      | 4.08  |                   |            |
|           | 905  | 916 s  | 11  |      |      |      |      | 4.37  |                   |            |
|           | 958  | 964 s  | 6   |      |      |      |      | 8.75  |                   |            |
|           | 1041 | 1058 s | 17  |      |      |      |      | 3.79  |                   |            |
|           | 1062 | 1082 s | 20  |      |      |      |      | 4.74  |                   |            |
|           | 1115 | 1127 s | 12  |      |      |      |      | 4.53  |                   |            |
|           | 1148 | 1162 t | 14  |      |      |      |      | 4     |                   |            |
|           | 1181 | 1201 t | 20  |      |      |      |      | 3.21  |                   |            |
|           | 1230 | 1240 t | 10  |      |      |      |      | 8.3   |                   |            |
|           | 1292 | 1297 t | 5   |      |      |      |      | 9.75  |                   |            |
|           | 1310 | 1314 t | 4   |      |      |      |      | 3.67  |                   |            |
|           | 1327 | 1335 t | 8   |      |      |      |      | 3.67  |                   |            |
|           | 1367 | 1702 t | 335 |      |      |      |      | 5.92  |                   |            |
|           | 1734 | 1748 t | 14  |      |      |      |      | 4.03  |                   |            |
|           | 1765 | 1828 t | 63  |      |      |      |      | 12.25 |                   |            |
| Kif16B    |      |        |     |      |      |      |      |       |                   |            |
|           | 36   | 52 m   | 16  | 17.5 | 10.8 | 20.6 | 15.2 | 5.85  | 1-366 Motor       | 8.87 m     |
|           | 102  | 120 m  | 18  |      |      |      |      | 5.83  | 400-425 CC        | 5.13 s     |
|           | 209  | 217 m  | 8   |      |      |      |      | 9.75  | 477-529 FHA       | 9.22 t     |
|           | 259  | 268 m  | 9   |      |      |      |      | 5.88  | 595-801 CC        | 5.86 total |
|           | 294  | 304 m  | 10  |      |      |      |      | 9.7   | 829-882 CC        |            |
|           | 364  | 367 m  | 3   |      |      |      |      | 3.67  | 936-1083 CC       |            |
|           | 393  | 399 s  | 6   |      |      |      |      | 3.8   | 367-1083 Stalk    | 61.7       |
|           | 592  | 617 s  | 25  |      |      |      |      | 5.24  | 1164-1301 PX      |            |
|           | 635  | 637 s  | 2   |      |      |      |      | 4     | 1084-1392 Tail    |            |
|           | 807  | 815 s  | 8   |      |      |      |      | 4.03  |                   |            |
|           | 875  | 883 s  | 8   |      |      |      |      | 4.65  |                   |            |
|           | 1020 | 1048 s | 28  |      |      |      |      | 6.77  |                   |            |
|           | 1080 | 1110 t | 30  |      |      |      |      | 5.78  |                   |            |
|           | 1139 | 1155 t | 16  |      |      |      |      | 4.75  |                   |            |
|           | 1287 | 1296 t | 9   |      |      |      |      | 10    |                   |            |
|           | 1334 | 1350 t | 16  |      |      |      |      | 6.85  |                   |            |
| Kif14     |      |        |     |      |      |      |      |       |                   |            |
|           | 1    | 65 t   | 14  | 8.5  | 25.4 | 81.5 | 38.8 | 6.89  | 1-355 Tail1       | 9.65 t     |
|           | 72   | 186 t  | 114 |      |      |      |      | 9.09  | 356-709 Motor     | 6.41 m     |
|           | 195  | 357 t  | 162 |      |      |      |      | 9.97  | 710-791 CC        | 7.13 s     |
|           | 449  | 455 m  | 6   |      |      |      |      | 8.26  | 824-876 FHA       | 5.5 t      |
|           | 556  | 568 m  | 12  |      |      |      |      | 8.75  | 922-1079 CC       | 8.06 total |
|           | 586  | 590 m  | 4   |      |      |      |      | 3.67  | 1471-1500 CC      |            |
|           | 610  | 618 m  | 8   |      |      |      |      | 5.08  | 710-1500 Stalk    | 40.4       |
|           | 732  | 740 s  | 8   |      |      |      |      | 6.07  | 1501-1648 Tail2   |            |
|           | 829  | 835 s  | 6   |      |      |      |      | 9.7   |                   |            |
|           | 901  | 924 s  | 23  |      |      |      |      | 8.9   |                   |            |
|           | 943  | 954 s  | 11  |      |      |      |      | 6.23  |                   |            |
|           | 964  | 1012 s | 48  |      |      |      |      | 5.79  |                   |            |
|           | 1111 | 1123 s | 12  |      |      |      |      | 5.3   |                   |            |
|           | 1154 | 1237 s | 83  |      |      |      |      | 5.73  |                   |            |
|           | 1287 | 1295 s | 8   |      |      |      |      | 3.39  |                   |            |
|           | 1403 | 1405 s | 2   |      |      |      |      | 8.75  |                   |            |
|           | 1548 | 1562 t | 14  |      |      |      |      | 4.37  |                   |            |
|           | 1587 | 1642 t | 55  |      |      |      |      | 6.03  |                   |            |
| Kinesin-4 |      |        |     |      |      |      |      |       |                   |            |
| Kif4A     |      |        |     |      |      |      |      |       |                   |            |
|           | 1    | 8 m    | 7   | 16.9 | 22.1 | 96.5 | 34.6 | 5.9   | 1-344 Motor       | 8.34 m     |
|           | 90   | 109 m  | 19  |      |      |      |      | 4.25  | 347-369 CC        | 5.7 s      |
|           | 201  | 206 m  | 5   |      |      |      |      | 5.57  | 382-460 CC        | 5.67 t     |
|           | 226  | 230 m  | 4   |      |      |      |      | 5.55  | 519-734 CC        | 5.99 total |
|           | 243  | 256 m  | 13  |      |      |      |      | 9.7   | 755-790 CC        |            |
|           | 277  | 287 m  | 10  |      |      |      |      | 5.96  | 742-856 ZBZ       |            |
|           | 341  | 347 s  | 6   |      |      |      |      | 3.8   | 808-849 CC        |            |
|           | 369  | 400 s  | 31  |      |      |      |      | 4.2   | 902-1000 CC       |            |
|           | 494  | 514 s  | 20  |      |      |      |      | 4     | 345-1000 Stalk    | 75.3       |
|           | 544  | 549 s  | 5   |      |      |      |      | 3.8   | 1001-1232 Tail    |            |
|           | 589  | 599 s  | 10  |      |      |      |      | 11.71 |                   |            |
|           | 713  | 742 s  | 29  |      |      |      |      | 10.41 |                   |            |
|           | 783  | 814 s  | 31  |      |      |      |      | 6.49  |                   |            |

|                  |      |        |     |      |      |      |      |                      |      |            |
|------------------|------|--------|-----|------|------|------|------|----------------------|------|------------|
|                  | 843  | 850 s  | 7   |      |      |      |      | 3.92                 |      |            |
|                  | 945  | 951 s  | 6   |      |      |      |      | 4.25                 |      |            |
|                  | 1003 | 1082 t | 79  |      |      |      |      | 4.76                 |      |            |
|                  | 1085 | 1173 t | 88  |      |      |      |      | 7.57                 |      |            |
|                  | 1176 | 1232 t | 56  |      |      |      |      | 8.87                 |      |            |
| Kif4B            |      |        |     | 14.8 | 18.6 | 94.4 | 31.8 |                      |      |            |
|                  | 1    | 8 m    | 7   |      |      |      |      | 5.9 1-344 Motor      |      | 8.45 m     |
|                  | 90   | 111 m  | 21  |      |      |      |      | 4.25 347-368 CC      |      | 5.62 s     |
|                  | 199  | 204 m  | 5   |      |      |      |      | 5.19 382-460 CC      |      | 5.51 t     |
|                  | 226  | 230 m  | 4   |      |      |      |      | 5.55 519-678 CC      |      | 5.88 total |
|                  | 245  | 256 m  | 11  |      |      |      |      | 9.7 685-734 CC       |      |            |
|                  | 283  | 286 m  | 3   |      |      |      |      | 5.52 756-790 CC      |      |            |
|                  | 341  | 348 s  | 7   |      |      |      |      | 5.08 742-856 ZBZ     |      |            |
|                  | 369  | 393 s  | 24  |      |      |      |      | 4.25 811-849 CC      |      |            |
|                  | 492  | 517 s  | 25  |      |      |      |      | 4.14 913-1000 CC     |      |            |
|                  | 707  | 739 s  | 32  |      |      |      |      | 9.99 345-1000 Stalk  | 71.7 |            |
|                  | 783  | 798 s  | 15  |      |      |      |      | 9.63 1001-1234 Tail  |      |            |
|                  | 843  | 849 s  | 6   |      |      |      |      | 3.92                 |      |            |
|                  | 945  | 958 s  | 13  |      |      |      |      | 4.95                 |      |            |
|                  | 1003 | 1167 t | 164 |      |      |      |      | 4.95                 |      |            |
|                  | 1178 | 1234 t | 56  |      |      |      |      | 9.25                 |      |            |
| Kif7             |      |        |     | 22   | 30.4 | 100  |      |                      |      |            |
|                  | 1    | 11 m   | 10  |      |      |      |      | 5.75 1-355 Motor     |      | 5.81 m     |
|                  | 94   | 115 m  | 21  |      |      |      |      | 4.53 360-389 CC      |      | 7.07 s     |
|                  | 201  | 218 m  | 17  |      |      |      |      | 12 488-552 CC        |      | 6.19 t     |
|                  | 230  | 240 m  | 10  |      |      |      |      | 12.3 711-903 CC      |      | 6.37 total |
|                  | 257  | 263 m  | 6   |      |      |      |      | 8.85 912-961 CC      |      |            |
|                  | 286  | 300 m  | 14  |      |      |      |      | 9.34 969-1082 CC     |      |            |
|                  | 350  | 359 s  | 9   |      |      |      |      | 12.3 1113-1225 CC    |      |            |
|                  | 381  | 397 s  | 16  |      |      |      |      | 12 356-1225 Stalk    | 65.1 |            |
|                  | 428  | 436 s  | 8   |      |      |      |      | 4 1226-1363 Tail     |      |            |
|                  | 449  | 486 s  | 37  |      |      |      |      | 4.12                 |      |            |
|                  | 552  | 696 s  | 144 |      |      |      |      | 5.85                 |      |            |
|                  | 703  | 708 s  | 5   |      |      |      |      | 5.52                 |      |            |
|                  | 784  | 791 s  | 7   |      |      |      |      | 11.7                 |      |            |
|                  | 900  | 913 s  | 13  |      |      |      |      | 6.2                  |      |            |
|                  | 966  | 975 s  | 9   |      |      |      |      | 4.37                 |      |            |
|                  | 1000 | 1016 s | 16  |      |      |      |      | 4.78                 |      |            |
|                  | 1224 | 1363 t | 139 |      |      |      |      | 6.21                 |      |            |
| Kif27            |      |        |     | 23.2 | 37.9 | 89.3 | 40.4 |                      |      |            |
|                  | 86   | 95 m   | 9   |      |      |      |      | 8.26 1-349 Motor     |      | 8.15 m     |
|                  | 100  | 105 m  | 5   |      |      |      |      | 4 352-418 CC         |      | 6.33 s     |
|                  | 190  | 204 m  | 14  |      |      |      |      | 6.92 477-557 CC      |      | 8.8 t      |
|                  | 222  | 231 m  | 9   |      |      |      |      | 3.57 701-891 CC      |      | 6.9 total  |
|                  | 246  | 261 m  | 15  |      |      |      |      | 8.79 915-1070 CC     |      |            |
|                  | 280  | 296 m  | 16  |      |      |      |      | 9.98 1118-1178 CC    |      |            |
|                  | 304  | 310 m  | 6   |      |      |      |      | 3.8 1183-1231 CC     |      |            |
|                  | 320  | 327 m  | 7   |      |      |      |      | 3.67 350-1231 Stalk  | 70.1 |            |
|                  | 343  | 354 s  | 11  |      |      |      |      | 4.37 1232-1401 Tail  |      |            |
|                  | 372  | 400 s  | 28  |      |      |      |      | 4.83                 |      |            |
|                  | 458  | 471 s  | 13  |      |      |      |      | 4.53                 |      |            |
|                  | 518  | 526 s  | 8   |      |      |      |      | 8.6                  |      |            |
|                  | 557  | 583 s  | 26  |      |      |      |      | 6.21                 |      |            |
|                  | 596  | 608 s  | 12  |      |      |      |      | 10.84                |      |            |
|                  | 634  | 703 s  | 69  |      |      |      |      | 4.21                 |      |            |
|                  | 712  | 716 s  | 4   |      |      |      |      | 8.75                 |      |            |
|                  | 747  | 750 s  | 3   |      |      |      |      | 3.8                  |      |            |
|                  | 820  | 844 s  | 24  |      |      |      |      | 8.43                 |      |            |
|                  | 852  | 857 s  | 5   |      |      |      |      | 9.75                 |      |            |
|                  | 866  | 871 s  | 5   |      |      |      |      | 8.75                 |      |            |
|                  | 884  | 916 s  | 32  |      |      |      |      | 8.5                  |      |            |
|                  | 966  | 985 s  | 19  |      |      |      |      | 8.33                 |      |            |
|                  | 999  | 1045 s | 46  |      |      |      |      | 9.16                 |      |            |
|                  | 1168 | 1180 s | 12  |      |      |      |      | 6.76                 |      |            |
|                  | 1185 | 1192 s | 7   |      |      |      |      | 4.14                 |      |            |
|                  | 1217 | 1345 t | 128 |      |      |      |      | 6.09                 |      |            |
|                  | 1378 | 1401 t | 23  |      |      |      |      | 8.59                 |      |            |
| Kif21A           |      |        |     | 14.9 | 36.2 | 42.2 | 33.6 |                      |      |            |
|                  | 1    | 9 m    | 8   |      |      |      |      | 3.67 1-370 Motor     |      | 6.11 m     |
|                  | 164  | 173 m  | 9   |      |      |      |      | 9.7 371-413 CC       |      | 6.63 s     |
|                  | 212  | 223 m  | 11  |      |      |      |      | 9.75 416-462 CC      |      | 5.66 t     |
|                  | 241  | 262 m  | 21  |      |      |      |      | 3.77 465-515 CC      |      | 6.05 total |
|                  | 281  | 288 m  | 7   |      |      |      |      | 11 532-838 CC        |      |            |
|                  | 373  | 377 s  | 4   |      |      |      |      | 8.75 931-1019 CC     |      |            |
|                  | 405  | 415 s  | 10  |      |      |      |      | 4.68 1053-1083 CC    |      |            |
|                  | 510  | 533 s  | 23  |      |      |      |      | 6.11 371-1083 Stalk  | 78.8 |            |
|                  | 546  | 642 s  | 96  |      |      |      |      | 11.24 1336-1373 WD40 |      |            |
|                  | 706  | 717 s  | 11  |      |      |      |      | 6.2 1376-1414 WD40   |      |            |
|                  | 777  | 806 s  | 29  |      |      |      |      | 10.15 1440-1478 WD40 |      |            |
|                  | 833  | 910 s  | 77  |      |      |      |      | 11.52 1481-1523 WD40 |      |            |
|                  | 974  | 982 s  | 8   |      |      |      |      | 4.14 1531-1569 WD40  |      |            |
|                  | 1104 | 1328 t | 224 |      |      |      |      | 5.17 1572-1612 WD40  |      |            |
|                  | 1530 | 1540 t | 10  |      |      |      |      | 5.24 1615-1652 WD40  |      |            |
|                  | 1659 | 1674 t | 15  |      |      |      |      | 3.37 1084-1674 Tail  |      |            |
| Kif21B           |      |        |     | 18.9 | 31.3 | 31.6 | 28.6 |                      |      |            |
|                  | 91   | 108 m  | 17  |      |      |      |      | 4.14 1-371 Motor     |      | 6.33 m     |
|                  | 129  | 137 m  | 8   |      |      |      |      | 9.6 372-412 CC       |      | 5.9 s      |
|                  | 162  | 173 m  | 11  |      |      |      |      | 11.52 418-467 CC     |      | 8.29 t     |
|                  | 211  | 221 m  | 10  |      |      |      |      | 9.75 472-514 CC      |      | 6.7 total  |
|                  | 243  | 260 m  | 17  |      |      |      |      | 3.49 532-612 CC      |      |            |
|                  | 281  | 288 m  | 7   |      |      |      |      | 8.75 627-828 CC      |      |            |
|                  | 406  | 417 s  | 11  |      |      |      |      | 4.68 924-1019 CC     |      |            |
|                  | 499  | 538 s  | 39  |      |      |      |      | 8.74 1047-1068 CC    |      |            |
|                  | 549  | 630 s  | 81  |      |      |      |      | 4.27 372-1068 Stalk  | 75.5 |            |
|                  | 825  | 866 s  | 41  |      |      |      |      | 6.31 1299-1336 WD40  |      |            |
|                  | 882  | 912 s  | 30  |      |      |      |      | 11.22 1339-1377 WD40 |      |            |
|                  | 963  | 974 s  | 11  |      |      |      |      | 4.49 1404-1441 WD40  |      |            |
|                  | 1011 | 1016 s | 5   |      |      |      |      | 3.57 1444-1486 WD40  |      |            |
|                  | 1063 | 1073 t | 10  |      |      |      |      | 5.84 1494-1532 WD40  |      |            |
|                  | 1099 | 1170 t | 71  |      |      |      |      | 4.75 1535-1575 WD40  |      |            |
|                  | 1176 | 1276 t | 100 |      |      |      |      | 10.42 1578-1615 WD40 |      |            |
|                  | 1492 | 1500 t | 8   |      |      |      |      | 5.21 1069-1668 Tail  |      |            |
| <b>Kinesin-5</b> |      |        |     |      |      |      |      |                      |      |            |
| Kif11            |      |        |     | 15.8 | 5.1  | 100  | 17   |                      |      |            |
|                  | 1    | 18 m   | 17  |      |      |      |      | 9.82 1-367 Motor     |      | 7.07 m     |
|                  | 54   | 61 m   | 7   |      |      |      |      | 5.5 368-511 CC       |      | 5.19 s     |
|                  | 109  | 130 m  | 21  |      |      |      |      | 4.06 535-551 CC      |      | 5.08 t     |

|                  |      |        |     |      |      |      |      |       |                  |      |            |
|------------------|------|--------|-----|------|------|------|------|-------|------------------|------|------------|
|                  | 177  | 183 m  | 6   |      |      |      |      | 4.37  | 665-692 CC       |      | 5.47 total |
|                  | 271  | 278 m  | 7   |      |      |      |      | 9.75  | 735-763 CC       |      |            |
|                  | 395  | 404 s  | 9   |      |      |      |      | 4.53  | 805-849 CC       |      |            |
|                  | 808  | 812 s  | 4   |      |      |      |      | 6     | 923-929 BimC Box |      |            |
|                  | 862  | 871 s  | 9   |      |      |      |      | 8.59  | 945-972 CC       |      |            |
|                  | 921  | 930 s  | 9   |      |      |      |      | 11    | 368-972 Stalk    | 49.2 |            |
|                  | 959  | 1050 t | 91  |      |      |      |      | 4.76  | 973-1056 Tail    |      |            |
| <b>Kinesin-6</b> |      |        |     |      |      |      |      |       |                  |      |            |
| Kif20A           | 1    | 35 t   | 34  | 25.6 | 19.5 | 61.2 | 31.3 | 3.28  | 1-61 Tail1       |      | 3.85 t     |
|                  | 46   | 62 t   | 16  |      |      |      |      | 3.92  | 62-515 Motor     |      | 8.79 m     |
|                  | 84   | 86 m   | 2   |      |      |      |      | 3.8   | 561-588 CC       |      | 4.87 s     |
|                  | 164  | 175 m  | 11  |      |      |      |      | 10    | 611-719 CC       |      | 10.04 t    |
|                  | 195  | 202 m  | 7   |      |      |      |      | 6.74  | 728-762 CC       |      | 6.49 total |
|                  | 227  | 236 m  | 9   |      |      |      |      | 3.67  | 516-762 Stalk    | 67.9 |            |
|                  | 249  | 293 m  | 44  |      |      |      |      | 4.66  | 763-890 Tail2    |      |            |
|                  | 321  | 326 m  | 5   |      |      |      |      | 12.01 |                  |      |            |
|                  | 370  | 377 m  | 7   |      |      |      |      | 6.46  |                  |      |            |
|                  | 413  | 431 m  | 18  |      |      |      |      | 8.27  |                  |      |            |
|                  | 448  | 461 m  | 13  |      |      |      |      | 10.84 |                  |      |            |
|                  | 513  | 517 s  | 4   |      |      |      |      | 5.28  |                  |      |            |
|                  | 535  | 551 s  | 16  |      |      |      |      | 3.96  |                  |      |            |
|                  | 661  | 677 s  | 16  |      |      |      |      | 9.61  |                  |      |            |
|                  | 715  | 727 s  | 12  |      |      |      |      | 8.59  |                  |      |            |
|                  | 825  | 890 t  | 65  |      |      |      |      | 11.07 |                  |      |            |
| Kif20B           | 1    | 25 t   | 24  | 22.8 | 27.7 | 73.4 | 31.5 | 4.68  | 1-55 Tail1       |      | 4.25 t     |
|                  | 48   | 54 t   | 6   |      |      |      |      | 3.8   | 56-486 Motor     |      | 8.84 m     |
|                  | 93   | 110 m  | 17  |      |      |      |      | 6.23  | 523-607 CC       |      | 5.02 s     |
|                  | 190  | 215 m  | 25  |      |      |      |      | 8.44  | 614-641 CC       |      | 10.39 t    |
|                  | 226  | 247 m  | 21  |      |      |      |      | 3.93  | 667-696 CC       |      | 5.54 total |
|                  | 292  | 295 m  | 3   |      |      |      |      | 8.47  | 710-795 CC       |      |            |
|                  | 343  | 349 m  | 6   |      |      |      |      | 8.75  | 873-985 CC       |      |            |
|                  | 380  | 396 m  | 16  |      |      |      |      | 4.87  | 1062-1559 CC     |      |            |
|                  | 420  | 430 m  | 10  |      |      |      |      | 8.34  | 1655-1675 CC     |      |            |
|                  | 483  | 491 s  | 8   |      |      |      |      | 4.37  | 487-1675 Stalk   | 65   |            |
|                  | 495  | 506 s  | 11  |      |      |      |      | 4.21  | 1676-1820 Tail2  |      |            |
|                  | 738  | 747 s  | 9   |      |      |      |      | 6.18  |                  |      |            |
|                  | 797  | 798 s  | 1   |      |      |      |      | 5.84  |                  |      |            |
|                  | 812  | 874 s  | 62  |      |      |      |      | 5.38  |                  |      |            |
|                  | 952  | 959 s  | 7   |      |      |      |      | 4.25  |                  |      |            |
|                  | 1012 | 1025 s | 13  |      |      |      |      | 3.57  |                  |      |            |
|                  | 1041 | 1053 s | 12  |      |      |      |      | 6.14  |                  |      |            |
|                  | 1096 | 1113 s | 17  |      |      |      |      | 5.58  |                  |      |            |
|                  | 1248 | 1279 s | 31  |      |      |      |      | 4.43  |                  |      |            |
|                  | 1329 | 1333 s | 4   |      |      |      |      | 4     |                  |      |            |
|                  | 1418 | 1437 s | 19  |      |      |      |      | 4.9   |                  |      |            |
|                  | 1564 | 1591 s | 27  |      |      |      |      | 4.86  |                  |      |            |
|                  | 1595 | 1598 s | 3   |      |      |      |      | 4.37  |                  |      |            |
|                  | 1607 | 1712 s | 105 |      |      |      |      | 9.87  |                  |      |            |
|                  | 1730 | 1732 t | 2   |      |      |      |      | 8.75  |                  |      |            |
|                  | 1755 | 1820 t | 65  |      |      |      |      | 10.23 |                  |      |            |
| Kif23            | 1    | 26 t   | 25  | 29.2 | 21.5 | 71.8 | 42.7 | 11.26 | 1-22 Tail1       |      | 12.04 t    |
|                  | 55   | 67 m   | 12  |      |      |      |      | 6.75  | 23-444 Motor     |      | 5.67 m     |
|                  | 112  | 130 m  | 18  |      |      |      |      | 6.75  | 535-640 CC       |      | 7.88 s     |
|                  | 155  | 162 m  | 7   |      |      |      |      | 4.21  | 445-640 Stalk    | 52.5 | 9.53 t     |
|                  | 173  | 195 m  | 22  |      |      |      |      | 10.27 | 641-960 Tail2    |      | 8.76 total |
|                  | 206  | 214 m  | 8   |      |      |      |      | 3.83  |                  |      |            |
|                  | 239  | 258 m  | 19  |      |      |      |      | 9.53  |                  |      |            |
|                  | 291  | 300 m  | 9   |      |      |      |      | 9.61  |                  |      |            |
|                  | 316  | 322 m  | 6   |      |      |      |      | 3.56  |                  |      |            |
|                  | 337  | 359 m  | 22  |      |      |      |      | 9.4   |                  |      |            |
|                  | 438  | 466 s  | 28  |      |      |      |      | 10.79 |                  |      |            |
|                  | 538  | 552 s  | 14  |      |      |      |      | 8.51  |                  |      |            |
|                  | 656  | 693 t  | 37  |      |      |      |      | 9.69  |                  |      |            |
|                  | 700  | 720 t  | 20  |      |      |      |      | 10.35 |                  |      |            |
|                  | 729  | 774 t  | 45  |      |      |      |      | 10.51 |                  |      |            |
|                  | 792  | 841 t  | 49  |      |      |      |      | 11.61 |                  |      |            |
|                  | 880  | 929 t  | 49  |      |      |      |      | 6.35  |                  |      |            |
|                  | 940  | 960 t  | 20  |      |      |      |      | 11.17 |                  |      |            |
| <b>Kinesin-7</b> |      |        |     |      |      |      |      |       |                  |      |            |
| Kif10            | 38   | 40 m   | 2   | 5.9  | 10.2 | 100  | 14.6 | 5.52  | 1-337 Motor      |      | 8.15 m     |
|                  | 189  | 198 m  | 9   |      |      |      |      | 8.6   | 338-401 CC       |      | 5.3 s      |
|                  | 216  | 225 m  | 9   |      |      |      |      | 4.53  | 489-609 CC       |      | 9.32 t     |
|                  | 367  | 372 s  | 5   |      |      |      |      | 6     | 629-785 CC       |      | 5.51 total |
|                  | 428  | 443 s  | 15  |      |      |      |      | 8.5   | 820-1000 CC      |      |            |
|                  | 471  | 473 s  | 2   |      |      |      |      | 5.49  | 1032-1282 CC     |      |            |
|                  | 802  | 815 s  | 13  |      |      |      |      | 5.96  | 1318-1391 CC     |      |            |
|                  | 877  | 878 s  | 1   |      |      |      |      | 6.1   | 1420-2007 CC     |      |            |
|                  | 897  | 905 s  | 8   |      |      |      |      | 4.37  | 2020-2066 CC     |      |            |
|                  | 986  | 1023 s | 37  |      |      |      |      | 4.72  | 2085-2127 CC     |      |            |
|                  | 1027 | 1034 s | 7   |      |      |      |      | 5.5   | 2281-2318 CC     |      |            |
|                  | 1101 | 1112 s | 11  |      |      |      |      | 8.48  | 2337-2466 CC     |      |            |
|                  | 1301 | 1320 s | 19  |      |      |      |      | 3.91  | 2499-2553 CC     |      |            |
|                  | 1378 | 1402 s | 24  |      |      |      |      | 6.31  | 338-2553 Stalk   | 79.8 |            |
|                  | 1760 | 1767 s | 7   |      |      |      |      | 6.74  | 2554-2701 Tail   |      |            |
|                  | 1885 | 1893 s | 8   |      |      |      |      | 8.59  |                  |      |            |
|                  | 1996 | 2001 s | 5   |      |      |      |      | 3.79  |                  |      |            |
|                  | 2068 | 2080 s | 12  |      |      |      |      | 10.9  |                  |      |            |
|                  | 2179 | 2184 s | 5   |      |      |      |      | 9.7   |                  |      |            |
|                  | 2315 | 2337 s | 22  |      |      |      |      | 4.55  |                  |      |            |
|                  | 2469 | 2495 s | 26  |      |      |      |      | 6.38  |                  |      |            |
|                  | 2554 | 2701 t | 147 |      |      |      |      | 9.32  |                  |      |            |
| <b>Kinesin-8</b> |      |        |     |      |      |      |      |       |                  |      |            |
| Kif18A           | 1    | 9 m    | 8   | 24   | 5.6  | 46.8 | 33.4 | 3.57  | 1-363 Motor      |      | 9.06 m     |
|                  | 47   | 67 m   | 20  |      |      |      |      | 9.83  | 368-408 CC       |      | 5.27 s     |
|                  | 118  | 126 m  | 8   |      |      |      |      | 8.76  | 413-453 CC       |      | 9.32 t     |
|                  | 209  | 227 m  | 18  |      |      |      |      | 10.84 | 364-453 Stalk    | 89.9 | 9.09 total |
|                  | 262  | 281 m  | 19  |      |      |      |      | 8.46  | 454-898 Tail     |      |            |
|                  | 296  | 310 m  | 14  |      |      |      |      | 10.28 |                  |      |            |
|                  | 401  | 406 s  | 5   |      |      |      |      | 3.67  |                  |      |            |
|                  | 473  | 482 t  | 9   |      |      |      |      | 8.57  |                  |      |            |
|                  | 524  | 526 t  | 2   |      |      |      |      | 5.52  |                  |      |            |
|                  | 619  | 632 t  | 13  |      |      |      |      | 4.37  |                  |      |            |



|                   |      |        |     |      |      |      |      |       |                 |      |            |
|-------------------|------|--------|-----|------|------|------|------|-------|-----------------|------|------------|
|                   | 640  | 695 t  | 55  |      |      |      |      | 10.2  |                 |      |            |
|                   | 753  | 766 t  | 13  |      |      |      |      | 6.75  |                 |      |            |
|                   | 777  | 819 t  | 42  |      |      |      |      | 8.15  |                 |      |            |
|                   | 824  | 898 t  | 74  |      |      |      |      | 11.34 |                 |      |            |
| Kif18B            | 1    | 10 m   | 9   | 32.9 | 12.1 | 85.8 | 60.4 | 6.49  | 1-359 Motor     |      | 7.82 m     |
|                   | 13   | 27 m   | 14  |      |      |      |      | 6.17  | 361-393 CC      |      | 8.06 s     |
|                   | 40   | 65 m   | 25  |      |      |      |      | 4.18  | 360-393 Stalk   | 100  | 9.24 t     |
|                   | 114  | 127 m  | 13  |      |      |      |      | 8.57  | 394-852 Tail    |      | 9.01 total |
|                   | 172  | 177 m  | 5   |      |      |      |      | 4.35  |                 |      |            |
|                   | 206  | 223 m  | 17  |      |      |      |      | 9.55  |                 |      |            |
|                   | 255  | 273 m  | 18  |      |      |      |      | 6.07  |                 |      |            |
|                   | 294  | 307 m  | 13  |      |      |      |      | 9.99  |                 |      |            |
|                   | 314  | 318 m  | 4   |      |      |      |      | 5.84  |                 |      |            |
|                   | 357  | 361 s  | 4   |      |      |      |      | 8.79  |                 |      |            |
|                   | 390  | 431 t  | 41  |      |      |      |      | 8.49  |                 |      |            |
|                   | 437  | 501 t  | 64  |      |      |      |      | 3.76  |                 |      |            |
|                   | 546  | 740 t  | 194 |      |      |      |      | 9.69  |                 |      |            |
|                   | 751  | 756 t  | 5   |      |      |      |      | 5.83  |                 |      |            |
|                   | 760  | 836 t  | 76  |      |      |      |      | 11.64 |                 |      |            |
| Kif19             | 839  | 852 t  | 13  |      |      |      |      | 12    |                 |      |            |
|                   | 1    | 9 m    | 8   | 17.5 | 29.4 | 70.1 | 43.3 | 4.43  | 1-354 Motor     |      | 6.99 m     |
|                   | 203  | 221 m  | 18  |      |      |      |      | 11.7  | 356-391 CC      |      | 8.91 s     |
|                   | 252  | 270 m  | 18  |      |      |      |      | 10.74 | 418-454 CC      |      | 9.11 t     |
|                   | 288  | 297 m  | 9   |      |      |      |      | 8.22  | 507-552 CC      |      | 8.87 total |
|                   | 322  | 331 m  | 9   |      |      |      |      | 5.24  | 355-552 Stalk   | 56.6 |            |
|                   | 381  | 401 s  | 20  |      |      |      |      | 10.61 | 553-998 Tail    |      |            |
|                   | 409  | 417 s  | 8   |      |      |      |      | 6.75  |                 |      |            |
|                   | 477  | 507 s  | 30  |      |      |      |      | 3.91  |                 |      |            |
|                   | 551  | 556 t  | 5   |      |      |      |      | 12    |                 |      |            |
|                   | 657  | 683 t  | 26  |      |      |      |      | 4.23  |                 |      |            |
|                   | 691  | 770 t  | 79  |      |      |      |      | 6.74  |                 |      |            |
|                   | 776  | 778 t  | 2   |      |      |      |      | 5.19  |                 |      |            |
|                   | 792  | 939 t  | 147 |      |      |      |      | 10.64 |                 |      |            |
|                   | 945  | 998 t  | 53  |      |      |      |      | 11.45 |                 |      |            |
| <b>Kinesin-9</b>  |      |        |     |      |      |      |      |       |                 |      |            |
| Kif6              | 24   | 33 m   | 9   | 8.8  | 19.7 | 61.2 | 21.5 | 3.92  | 1-353 Motor     |      | 6.36 m     |
|                   | 161  | 168 m  | 7   |      |      |      |      | 4.13  | 356-388 CC      |      | 7.36 s     |
|                   | 257  | 264 m  | 7   |      |      |      |      | 8.72  | 427-441 CC      |      | 5.49 t     |
|                   | 291  | 299 m  | 8   |      |      |      |      | 10.84 | 456-496 CC      |      | 6.47 total |
|                   | 350  | 356 s  | 6   |      |      |      |      | 3.79  | 588-612 CC      |      |            |
|                   | 436  | 457 s  | 21  |      |      |      |      | 4.51  | 633-684 CC      |      |            |
|                   | 497  | 535 s  | 38  |      |      |      |      | 9.96  | 354-684 Stalk   | 46.2 |            |
|                   | 700  | 707 t  | 7   |      |      |      |      | 6.71  | 685-814 Tail    |      |            |
|                   | 712  | 737 t  | 25  |      |      |      |      | 4.31  |                 |      |            |
|                   | 750  | 790 t  | 40  |      |      |      |      | 8.18  |                 |      |            |
| Kif9              | 807  | 814 t  | 7   |      |      |      |      | 8.22  |                 |      |            |
|                   | 25   | 32 m   | 7   | 10.4 | 35.8 | 8.8  | 21.5 | 8.59  | 1-345 Motor     |      | 6.87 m     |
|                   | 36   | 45 m   | 9   |      |      |      |      | 11    | 346-381 CC      |      | 6.66 s     |
|                   | 157  | 160 m  | 3   |      |      |      |      | 5.95  | 389-402 CC      |      | 6.11 t     |
|                   | 246  | 263 m  | 17  |      |      |      |      | 8.59  | 414-443 CC      |      | 6.71 total |
|                   | 342  | 350 s  | 8   |      |      |      |      | 4.53  | 597-643 CC      |      |            |
|                   | 468  | 541 s  | 73  |      |      |      |      | 9.52  | 654-698 CC      |      |            |
|                   | 547  | 579 s  | 32  |      |      |      |      | 5.1   | 346-698 Stalk   | 48.1 |            |
|                   | 605  | 614 s  | 9   |      |      |      |      | 10.74 | 699-790 Tail    |      |            |
|                   | 642  | 646 s  | 4   |      |      |      |      | 6     |                 |      |            |
|                   | 782  | 790 t  | 8   |      |      |      |      | 11    |                 |      |            |
| <b>Kinesin-10</b> |      |        |     |      |      |      |      |       |                 |      |            |
| Kif22             | 1    | 43 t   | 42  | 25.4 | 54.2 | 74.5 | 45.4 | 12.22 | 1-40 Tail1      |      | 12.13 t    |
|                   | 54   | 68 m   | 14  |      |      |      |      | 4.21  | 41-376 Motor    |      | 9.38 m     |
|                   | 127  | 144 m  | 17  |      |      |      |      | 6.75  | 465-508 CC      |      | 6.73 s     |
|                   | 229  | 247 m  | 18  |      |      |      |      | 12.6  | 377-508 Stalk   | 31.2 | 9.22 t     |
|                   | 254  | 266 m  | 12  |      |      |      |      | 11.52 | 602-621 HhH     |      | 9.5 total  |
|                   | 274  | 298 m  | 24  |      |      |      |      | 8.59  | 632-651 HhH     |      |            |
|                   | 376  | 431 s  | 55  |      |      |      |      | 5.75  | 509-665 Tail2   |      |            |
|                   | 452  | 468 s  | 16  |      |      |      |      | 10.83 |                 |      |            |
|                   | 473  | 527 t  | 54  |      |      |      |      | 9.21  |                 |      |            |
|                   | 538  | 574 t  | 36  |      |      |      |      | 5.22  |                 |      |            |
|                   | 626  | 633 t  | 7   |      |      |      |      | 3.67  |                 |      |            |
|                   | 658  | 665 t  | 7   |      |      |      |      | 8.29  |                 |      |            |
| <b>Kinesin-11</b> |      |        |     |      |      |      |      |       |                 |      |            |
| Kif26A            | 1    | 69 t   | 68  | 19.5 | 79.9 | 63.6 | 66.7 | 5.64  | 1-119 Tail1     |      | 8.9 t      |
|                   | 89   | 97 t   | 8   |      |      |      |      | 5.55  | 120-145 CC      |      | 9.12 s     |
|                   | 110  | 116 t  | 6   |      |      |      |      | 5.57  | 120-368 Stalk   | 10.1 | 9.43 m     |
|                   | 144  | 209 s  | 65  |      |      |      |      | 6.93  | 369-733 Motor   |      | 8.99 s     |
|                   | 259  | 300 s  | 41  |      |      |      |      | 8.03  | 1778-1815 CC    |      | 4.54 t     |
|                   | 316  | 368 s  | 52  |      |      |      |      | 10.3  | 1832-1852 CC    |      | 9.12 total |
|                   | 406  | 424 m  | 18  |      |      |      |      | 8.75  | 734-1852 Stalk  | 5.1  |            |
|                   | 476  | 488 m  | 12  |      |      |      |      | 5.55  | 1853-1882 Tail2 |      |            |
|                   | 536  | 549 m  | 13  |      |      |      |      | 3.67  |                 |      |            |
|                   | 587  | 599 m  | 12  |      |      |      |      | 8.25  |                 |      |            |
|                   | 618  | 624 m  | 6   |      |      |      |      | 8.25  |                 |      |            |
|                   | 641  | 651 m  | 10  |      |      |      |      | 6.05  |                 |      |            |
|                   | 726  | 840 s  | 114 |      |      |      |      | 7.89  |                 |      |            |
|                   | 849  | 1012 s | 163 |      |      |      |      | 5.89  |                 |      |            |
|                   | 1016 | 1025 s | 9   |      |      |      |      | 5.66  |                 |      |            |
|                   | 1049 | 1056 s | 7   |      |      |      |      | 9.75  |                 |      |            |
|                   | 1081 | 1112 s | 31  |      |      |      |      | 3.83  |                 |      |            |
|                   | 1119 | 1243 s | 124 |      |      |      |      | 6.74  |                 |      |            |
|                   | 1250 | 1272 s | 22  |      |      |      |      | 6.06  |                 |      |            |
|                   | 1294 | 1561 s | 267 |      |      |      |      | 11.85 |                 |      |            |
|                   | 1569 | 1741 s | 172 |      |      |      |      | 9.97  |                 |      |            |
|                   | 1753 | 1776 s | 23  |      |      |      |      | 6.21  |                 |      |            |
|                   | 1870 | 1882 t | 12  |      |      |      |      | 3.49  |                 |      |            |
| Kif26B            | 1    | 128 t  | 127 | 15.5 | 77.5 | 95   | 65.1 | 9.58  | 1-128 Tail1     |      | 9.58 t     |
|                   | 148  | 150 s  | 2   |      |      |      |      | 5.52  | 129-147 CC      |      | 9.3 s      |
|                   | 157  | 158 s  | 1   |      |      |      |      | 5.96  | 129-447 Stalk   | 5.7  | 9.13 m     |
|                   | 208  | 304 s  | 96  |      |      |      |      | 9.15  | 448-809 Motor   |      | 6.87 s     |
|                   | 345  | 346 s  | 1   |      |      |      |      | 5.52  | 1994-2049 CC    |      | 10.26 t    |
|                   | 355  | 380 s  | 25  |      |      |      |      | 4.37  | 2072-2095 CC    |      | 8.76 total |
|                   | 396  | 447 s  | 51  |      |      |      |      | 10.3  | 810-2095 Stalk  | 6.1  |            |

|                   |      |        |     |      |      |      |      |       |                 |      |            |
|-------------------|------|--------|-----|------|------|------|------|-------|-----------------|------|------------|
|                   | 463  | 473 m  | 10  |      |      |      |      | 6.07  | 2096-2108 Tail2 |      |            |
|                   | 487  | 502 m  | 15  |      |      |      |      | 9.51  |                 |      |            |
|                   | 616  | 624 m  | 8   |      |      |      |      | 3.8   |                 |      |            |
|                   | 670  | 675 m  | 5   |      |      |      |      | 3.28  |                 |      |            |
|                   | 694  | 702 m  | 8   |      |      |      |      | 10    |                 |      |            |
|                   | 718  | 728 m  | 10  |      |      |      |      | 8.79  |                 |      |            |
|                   | 801  | 922 s  | 121 |      |      |      |      | 5.69  |                 |      |            |
|                   | 932  | 1167 s | 235 |      |      |      |      | 5.74  |                 |      |            |
|                   | 1176 | 1180 s | 4   |      |      |      |      | 5.49  |                 |      |            |
|                   | 1200 | 1208 s | 8   |      |      |      |      | 5.84  |                 |      |            |
|                   | 1246 | 1296 s | 50  |      |      |      |      | 4.75  |                 |      |            |
|                   | 1303 | 1313 s | 10  |      |      |      |      | 4.51  |                 |      |            |
|                   | 1329 | 1339 s | 10  |      |      |      |      | 8.2   |                 |      |            |
|                   | 1346 | 1358 s | 12  |      |      |      |      | 5.96  |                 |      |            |
|                   | 1375 | 1379 s | 4   |      |      |      |      | 5.19  |                 |      |            |
|                   | 1396 | 1507 s | 111 |      |      |      |      | 5.01  |                 |      |            |
|                   | 1513 | 1676 s | 163 |      |      |      |      | 9.75  |                 |      |            |
|                   | 1684 | 1985 s | 301 |      |      |      |      | 11.38 |                 |      |            |
|                   | 2002 | 2011 s | 9   |      |      |      |      | 11.71 |                 |      |            |
|                   | 2102 | 2108 t | 6   |      |      |      |      | 11.7  |                 |      |            |
| <b>Kinesin-12</b> |      |        |     |      |      |      |      |       |                 |      |            |
| Kif12             | 1    | 26 m   | 25  | 20.4 | 53.2 | 100  | 36.4 | 4     | 1-368 Motor     |      | 9.63 m     |
|                   | 51   | 52 m   | 1   |      |      |      |      | 5.24  | 371-408 CC      |      | 8.27 s     |
|                   | 106  | 127 m  | 21  |      |      |      |      | 5.66  | 414-467 CC      |      | 11.52 t    |
|                   | 172  | 181 m  | 9   |      |      |      |      | 12    | 605-621 CC      |      | 9.19 total |
|                   | 215  | 225 m  | 10  |      |      |      |      | 12    | 369-621 Stalk   | 42.1 |            |
|                   | 243  | 252 m  | 9   |      |      |      |      | 3.67  | 622-646 Tail    |      |            |
|                   | 356  | 375 s  | 19  |      |      |      |      | 12.31 |                 |      |            |
|                   | 471  | 504 s  | 33  |      |      |      |      | 6.97  |                 |      |            |
|                   | 520  | 572 s  | 52  |      |      |      |      | 8.44  |                 |      |            |
|                   | 577  | 607 s  | 30  |      |      |      |      | 5.9   |                 |      |            |
|                   | 620  | 646 t  | 26  |      |      |      |      | 11.52 |                 |      |            |
| Kif15             | 1    | 28 m   | 27  | 18.6 | 14.1 |      | 15.2 | 5.94  | 1-371 Motor     |      | 8.55 m     |
|                   | 36   | 46 m   | 10  |      |      |      |      | 4.14  | 372-399 CC      |      | 5.46 s     |
|                   | 61   | 65 m   | 4   |      |      |      |      | 6.74  | 425-446 CC      |      | 5.75 total |
|                   | 111  | 115 m  | 4   |      |      |      |      | 8.41  | 484-529 CC      |      |            |
|                   | 123  | 131 m  | 8   |      |      |      |      | 4.35  | 576-650 CC      |      |            |
|                   | 152  | 153 m  | 1   |      |      |      |      | 6.1   | 706-815 CC      |      |            |
|                   | 221  | 236 m  | 15  |      |      |      |      | 12    | 825-1037 CC     |      |            |
|                   | 272  | 278 s  | 6   |      |      |      |      | 5.32  | 1057-1138 CC    |      |            |
|                   | 367  | 374 s  | 7   |      |      |      |      | 3.67  | 1151-1253 CC    |      |            |
|                   | 393  | 406 s  | 13  |      |      |      |      | 3.8   | 1261-1388 CC    |      |            |
|                   | 481  | 484 s  | 3   |      |      |      |      | 4     | 372-1388 Stalk  | 78.9 |            |
|                   | 555  | 574 s  | 19  |      |      |      |      | 8.16  |                 |      |            |
|                   | 663  | 682 s  | 19  |      |      |      |      | 9.7   |                 |      |            |
|                   | 696  | 704 s  | 8   |      |      |      |      | 3.67  |                 |      |            |
|                   | 920  | 927 s  | 7   |      |      |      |      | 4     |                 |      |            |
|                   | 973  | 980 s  | 7   |      |      |      |      | 4.56  |                 |      |            |
|                   | 1132 | 1147 s | 15  |      |      |      |      | 4.54  |                 |      |            |
|                   | 1223 | 1250 s | 27  |      |      |      |      | 4.5   |                 |      |            |
|                   | 1377 | 1388 s | 11  |      |      |      |      | 9.7   |                 |      |            |
| <b>Kinesin-13</b> |      |        |     |      |      |      |      |       |                 |      |            |
| Kif2A             | 1    | 4 t    | 3   | 13.8 | 43   | 83.7 | 38.8 | 5.28  | 1-157 Tail1     |      | 5.92 t     |
|                   | 66   | 193 t  | 127 |      |      |      |      | 9.86  | 158-177 CC      |      | 7.99 s     |
|                   | 206  | 218 s  | 12  |      |      |      |      | 4.21  | 158-219 Stalk1  | 29.7 | 9.35 m     |
|                   | 313  | 336 m  | 23  |      |      |      |      | 8.18  | 220-560 Motor   |      | 4.24 s     |
|                   | 421  | 432 m  | 11  |      |      |      |      | 9.76  | 561-728 Stalk2  | 40.6 | 9.99 t     |
|                   | 463  | 474 m  | 11  |      |      |      |      | 5.96  | 705-728 CC      |      | 6.01 total |
|                   | 504  | 506 m  | 2   |      |      |      |      | 9.75  | 729-744 Tail2   |      |            |
|                   | 555  | 641 s  | 86  |      |      |      |      | 4.21  |                 |      |            |
|                   | 730  | 744 t  | 14  |      |      |      |      | 9.99  |                 |      |            |
| Kif2B             | 1    | 19 t   | 18  | 11.8 | 26.9 | 53.3 | 25.1 | 5.75  | 1-150 Tail      |      | 9.1 t      |
|                   | 84   | 146 t  | 62  |      |      |      |      | 4.35  | 151-182 CC      |      | 9.8 s      |
|                   | 176  | 183 s  | 7   |      |      |      |      | 5.84  | 151-210 Stalk1  | 54.4 | 8.95 m     |
|                   | 200  | 209 s  | 9   |      |      |      |      | 5.72  | 211-549 Motor   |      | 5.97 s     |
|                   | 304  | 323 m  | 19  |      |      |      |      | 4.21  | 550-673 Stalk2  | 27.1 | 8.89 total |
|                   | 412  | 424 m  | 12  |      |      |      |      | 12    | 638-673 CC      |      |            |
|                   | 454  | 463 m  | 9   |      |      |      |      | 9.99  |                 |      |            |
|                   | 550  | 563 s  | 13  |      |      |      |      | 8.61  |                 |      |            |
|                   | 597  | 614 s  | 17  |      |      |      |      | 4.68  |                 |      |            |
|                   | 670  | 673 s  | 3   |      |      |      |      | 5.72  |                 |      |            |
| Kif2C             | 1    | 8 t    | 7   | 22.8 | 42.5 | 67.4 | 39.4 | 3.8   | 1-184 Tail      |      | 7.81 t     |
|                   | 68   | 185 t  | 117 |      |      |      |      | 9.42  | 185-225 CC      |      | 9.3 s      |
|                   | 186  | 229 s  | 43  |      |      |      |      | 9.92  | 185-255 Stalk1  |      |            |
|                   | 248  | 254 s  | 6   |      |      |      |      | 3.8   | 256-594 Motor   | 58   | 9.16 m     |
|                   | 347  | 370 m  | 23  |      |      |      |      | 8.51  | 595-725 Stalk2  |      | 4.43 s     |
|                   | 457  | 469 m  | 12  |      |      |      |      | 9.41  | 618-659 CC      | 61.4 | 8.03 total |
|                   | 492  | 511 m  | 19  |      |      |      |      | 4.68  | 680-725 CC      |      |            |
|                   | 532  | 543 m  | 11  |      |      |      |      | 9.99  |                 |      |            |
|                   | 585  | 597 m  | 12  |      |      |      |      | 5.4   |                 |      |            |
|                   | 608  | 632 s  | 24  |      |      |      |      | 3.98  |                 |      |            |
|                   | 713  | 725 s  | 12  |      |      |      |      | 12.02 |                 |      |            |
| Kif24             | 44   | 49 t   | 5   | 15.7 | 91   | 49.1 | 64   | 5.08  | 1-64 SAM        |      | 5.8 t      |
|                   | 65   | 128 t  | 63  |      |      |      |      | 4.97  | 1-220 Tail1     |      | 8.83 m     |
|                   | 140  | 165 t  | 25  |      |      |      |      | 4.41  | 221-552 Motor   |      | 6.67 s     |
|                   | 188  | 221 t  | 33  |      |      |      |      | 8.19  | 553-1308 Stalk  | 4.1  | 4.55 t     |
|                   | 320  | 324 m  | 4   |      |      |      |      | 5.18  | 1287-1308 CC    |      | 6.69 total |
|                   | 410  | 428 m  | 18  |      |      |      |      | 8.75  | 1309-1368 Tail2 |      |            |
|                   | 451  | 470 m  | 19  |      |      |      |      | 4.78  |                 |      |            |
|                   | 494  | 502 m  | 8   |      |      |      |      | 11    |                 |      |            |
|                   | 531  | 534 m  | 3   |      |      |      |      | 5.24  |                 |      |            |
|                   | 549  | 590 s  | 41  |      |      |      |      | 10.06 |                 |      |            |
|                   | 594  | 759 s  | 165 |      |      |      |      | 10.44 |                 |      |            |
|                   | 783  | 870 s  | 87  |      |      |      |      | 4.87  |                 |      |            |
|                   | 876  | 1246 s | 370 |      |      |      |      | 4.95  |                 |      |            |
|                   | 1262 | 1286 s | 24  |      |      |      |      | 9.7   |                 |      |            |
|                   | 1357 | 1368 t | 11  |      |      |      |      | 4     |                 |      |            |
| <b>Kinesin-14</b> |      |        |     |      |      |      |      |       |                 |      |            |
| KifC1             | 1    | 141 t  | 140 | 33.1 | 0    | 87   | 38.5 | 10.93 | 1-161 Tail      |      | 10.5 t     |
|                   | 318  | 376 m  | 58  |      |      |      |      | 9.33  | 162-312 CC      |      | 5.4 s      |

|       |     |       |     |            |           |            |            |       |                    |      |            |
|-------|-----|-------|-----|------------|-----------|------------|------------|-------|--------------------|------|------------|
|       | 411 | 431 m | 20  |            |           |            |            | 4.14  | 162-312 Stalk      | 100  | 6.68 m     |
|       | 477 | 492 m | 15  |            |           |            |            | 9.49  | 313-673 Motor      |      | 9.15 total |
|       | 528 | 534 m | 6   |            |           |            |            | 9.6   |                    |      |            |
|       | 552 | 555 m | 3   |            |           |            |            | 9.47  |                    |      |            |
|       | 571 | 584 m | 13  |            |           |            |            | 4.68  |                    |      |            |
|       | 669 | 673 m | 4   |            |           |            |            | 11    |                    |      |            |
| KifC2 |     |       |     |            |           |            |            |       |                    |      |            |
|       | 19  | 75 t  | 56  | 31.8       | 20.5      | 85.9       | 47.9       | 4.76  | 1-185 Tail1        |      | 4.74 t     |
|       | 95  | 115 t | 20  |            |           |            |            | 3.79  | 186-258 CC         |      | 4.9 s      |
|       | 134 | 188 t | 54  |            |           |            |            | 5.01  | 270-351 CC         |      | 10.82 m    |
|       | 227 | 232 s | 5   |            |           |            |            | 3.8   | 186-406 Stalk      | 69.5 | 12.45 t    |
|       | 258 | 268 s | 10  |            |           |            |            | 9.76  | 407-725 Motor      |      | 9.62 total |
|       | 376 | 406 s | 30  |            |           |            |            | 4.53  | 726-838 Tail2      |      |            |
|       | 421 | 441 m | 20  |            |           |            |            | 5.72  |                    |      |            |
|       | 486 | 504 m | 18  |            |           |            |            | 4.14  |                    |      |            |
|       | 543 | 560 m | 17  |            |           |            |            | 6.57  |                    |      |            |
|       | 587 | 600 m | 13  |            |           |            |            | 12    |                    |      |            |
|       | 611 | 621 m | 10  |            |           |            |            | 9.79  |                    |      |            |
|       | 632 | 650 m | 18  |            |           |            |            | 8.84  |                    |      |            |
|       | 675 | 680 m | 5   |            |           |            |            | 9.81  |                    |      |            |
|       | 713 | 838 t | 125 |            |           |            |            | 12.33 |                    |      |            |
| KifC3 |     |       |     |            |           |            |            |       |                    |      |            |
|       | 1   | 81 t  | 80  | 16.3       | 17        | 94.9       | 31.3       | 11.7  | 1-101 Tail1        |      | 11.29 t    |
|       | 93  | 99 t  | 6   |            |           |            |            | 6.74  | 102-166 CC         |      | 6.86 s     |
|       | 123 | 134 s | 11  |            |           |            |            | 4.68  | 172-251 CC         |      | 5.5 m      |
|       | 162 | 181 s | 19  |            |           |            |            | 6.42  | 257-368 CC         |      | 10.03 t    |
|       | 239 | 252 s | 13  |            |           |            |            | 5.32  | 394-444 CC         |      | 7.62 total |
|       | 267 | 282 s | 15  |            |           |            |            | 9.99  | 102-444 Stalk      | 87.6 |            |
|       | 453 | 469 m | 16  |            |           |            |            | 4.41  | 445-776 Motor      |      |            |
|       | 535 | 543 m | 8   |            |           |            |            | 3.79  | 777-833 Tail2      |      |            |
|       | 635 | 639 m | 4   |            |           |            |            | 4     |                    |      |            |
|       | 663 | 664 m | 1   |            |           |            |            | 5.52  |                    |      |            |
|       | 673 | 689 m | 16  |            |           |            |            | 4.68  |                    |      |            |
|       | 714 | 723 m | 9   |            |           |            |            | 12    |                    |      |            |
|       | 770 | 833 t | 63  |            |           |            |            | 11.27 |                    |      |            |
|       |     |       |     | 18.2348837 | 29.5      | 71.7595238 | 34.8095238 |       | Average            |      |            |
|       |     |       |     | 6.57208685 | 19.498608 | 23.9373681 | 13.324758  |       | Standard Deviation |      |            |

| Family            | L1 | L2 | L3 | L4 | P-loop | L5 | L6 | L7 | L8 | L9 | Switch I | L10 | Switch II | L11 | L12 | L13 | L14 | NL |
|-------------------|----|----|----|----|--------|----|----|----|----|----|----------|-----|-----------|-----|-----|-----|-----|----|
| <b>Kinesin-1</b>  | 3  | 0  | 0  | 0  | 3      | 0  | 0  | 0  | 0  | 0  | 3        | 1   | 3         | 0   | 0   | 0   | 0   | 0  |
| <b>Kinesin-2</b>  | 3  | 4  | 0  | 0  | 3      | 0  | 0  | 3  | 0  | 0  | 3        | 2   | 4         | 0   | 3   | 1   | 0   | 4  |
| <b>Kinesin-3</b>  | 5  | 12 | 2  | 0  | 8      | 0  | 0  | 3  | 0  | 0  | 7        | 7   | 8         | 0   | 6   | 0   | 1   | 3  |
| <b>Kinesin-4</b>  | 4  | 0  | 0  | 0  | 5      | 1  | 1  | 0  | 2  | 0  | 6        | 5   | 6         | 0   | 6   | 0   | 1   | 6  |
| <b>Kinesin-5</b>  | 1  | 1  | 0  | 0  | 1      | 0  | 0  | 1  | 0  | 0  | 0        | 0   | 1         | 0   | 0   | 0   | 0   | 0  |
| <b>Kinesin-6</b>  | 2  | 1  | 0  | 0  | 2      | 4  | 4  | 2  | 0  | 0  | 3        | 1   | 3         | 0   | 2   | 0   | 0   | 3  |
| <b>Kinesin-7</b>  | 0  | 1  | 0  | 0  | 0      | 0  | 0  | 0  | 0  | 0  | 1        | 1   | 0         | 0   | 0   | 1   | 0   | 1  |
| <b>Kinesin-8</b>  | 4  | 1  | 0  | 0  | 2      | 0  | 0  | 1  | 0  | 0  | 3        | 0   | 3         | 0   | 3   | 0   | 1   | 1  |
| <b>Kinesin-9</b>  | 0  | 3  | 0  | 0  | 0      | 0  | 0  | 2  | 1  | 0  | 0        | 0   | 2         | 0   | 0   | 0   | 0   | 2  |
| <b>Kinesin-10</b> | 0  | 1  | 0  | 0  | 1      | 0  | 0  | 0  | 0  | 0  | 1        | 1   | 1         | 0   | 0   | 0   | 0   | 0  |
| <b>Kinesin-11</b> | 0  | 3  | 0  | 0  | 1      | 0  | 0  | 2  | 1  | 0  | 2        | 2   | 1         | 0   | 0   | 0   | 1   | 0  |
| <b>Kinesin-12</b> | 3  | 2  | 0  | 0  | 3      | 0  | 1  | 1  | 0  | 0  | 2        | 1   | 1         | 0   | 0   | 0   | 0   | 2  |
| <b>Kinesin-13</b> | 0  | 0  | 0  | 0  | 4      | 0  | 0  | 0  | 0  | 0  | 4        | 0   | 4         | 0   | 3   | 0   | 1   | 0  |
| <b>Kinesin-14</b> | 0  | 3  | 0  | 0  | 3      | 0  | 0  | 2  | 0  | 0  | 3        | 3   | 3         | 0   | 1   | 0   | 3   | 0  |
| <b>Total</b>      | 25 | 32 | 2  | 0  | 36     | 5  | 6  | 17 | 4  | 0  | 38       | 24  | 40        | 0   | 24  | 2   | 8   | 22 |

| Family            | Significant sequence differences relative to Kif5B motor                                                                                                                             |
|-------------------|--------------------------------------------------------------------------------------------------------------------------------------------------------------------------------------|
| <b>Kinesin-1</b>  | -                                                                                                                                                                                    |
| <b>Kinesin-2</b>  | Kif3C Switch II contains a 24 residue Gly-rich insert                                                                                                                                |
| <b>Kinesin-3</b>  | All Kinesin-3 motors except Kif14 contain a 5-12 residue Lys-rich L12 insert important for microtubule binding <sup>55</sup>                                                         |
| <b>Kinesin-4</b>  | -                                                                                                                                                                                    |
| <b>Kinesin-5</b>  | L5 contains a 8 residue insert that is involved in regulating motility <sup>56</sup>                                                                                                 |
| <b>Kinesin-6</b>  | All Kinesin-6 motors contain 20-100 residue L1 and L6 inserts important for microtubule binding and bundling <sup>57</sup>                                                           |
| <b>Kinesin-7</b>  | -                                                                                                                                                                                    |
| <b>Kinesin-8</b>  | All Kinesin-8 motors contain a 16-25 residue L2 insert rich in Pro and charged amino acids                                                                                           |
| <b>Kinesin-9</b>  | -                                                                                                                                                                                    |
| <b>Kinesin-10</b> | L1 contains a 35 residue insert rich in Ala and positive amino acids that is ubiquitinated by CHFR <sup>58</sup>                                                                     |
| <b>Kinesin-11</b> | All Kinesin-11 motors contain a 24 residue Pro-rich L1 insert, and are non-motile due to a 1 residue Switch I insert in the conserved SSRSH motif and a 4 residue Switch II deletion |
| <b>Kinesin-12</b> | All Kinesin-12 motors contain a 18 residue L1 insert                                                                                                                                 |
| <b>Kinesin-13</b> | All Kinesin-13 motors contain a 13 residue L2 insert that is important for the microtubule depolymerase activity of the motors <sup>38</sup>                                         |
| <b>Kinesin-14</b> | Neck-linker is located at the N-terminal end of the motor                                                                                                                            |

**Table S3.** Predicted ID regions located in the kinesin motor domains.

**Table S4.** Secondary structure estimates calculated from predictions and CD data for the Kif5B, Kif10, and KifC3 tails.

| Construct       | $\alpha$ -Helix (%) | $\beta$ -Strand (%) | Random Coil (%) | Predicted $\alpha$ -Helix (COILS) (%) | Predicted ID (%) | Number of Residues |
|-----------------|---------------------|---------------------|-----------------|---------------------------------------|------------------|--------------------|
| Kif5B 822-963   | 26                  | 14                  | 60              | 54                                    | 43               | 148                |
| Kif5B 860-963   | 28                  | 32                  | 40              | 40                                    | 53               | 110                |
| Kif5B 905-963   | 3                   | 12                  | 85              | 0                                     | 95               | 66                 |
| Kif10 2600-2701 | 7                   | 51                  | 42              | 0                                     | 100              | 112                |
| KifC3 1-99      | 7                   | 49                  | 44              | 0                                     | 89               | 108                |
